1     **Valid statistical approaches for clustered data: A Monte Carlo simulation study**

2                     Kristen A. McLaurin<sup>1</sup>, Amanda J. Fairchild<sup>2\*</sup>, Dexin Shi<sup>2</sup>,  
3                     Rosemarie M. Booze<sup>1</sup>, Charles F. Mactutus<sup>1\*</sup>

- 4
- 5             1. Program in Behavioral Neuroscience, Department of Psychology, University of South  
6                                     Carolina, Columbia, SC, USA
- 7             2. Quantitative Psychology, Department of Psychology, University of South Carolina,  
8                                     Columbia, SC, USA
- 9

10

11   **Short Title (≤70 characters):** Statistical Analysis of Clustered Data

12   **Number of Figures, Tables:** 6, 3

13

14   \*Corresponding Authors:

15             Amanda J. Fairchild, Ph.D. or Charles F. Mactutus, Ph.D.  
16             Department of Psychology  
17             1512 Pendleton Street  
18             University of South Carolina  
19             Columbia, SC 29208  
20             PH: +1 (803) 777-4137  
21             FAX: +1 (803) 777-9558  
22             E-mail: [afairchi@mailbox.sc.edu](mailto:afairchi@mailbox.sc.edu) or [mactutus@mailbox.sc.edu](mailto:mactutus@mailbox.sc.edu)

23

24

## 25 **Abstract**

26 The translation of preclinical studies to human applications is associated with a high failure rate,  
27 which may be exacerbated by limited training in experimental design and statistical analysis.  
28 Nested experimental designs, which occur when data have a multilevel structure (e.g., *in vitro*:  
29 cells within a culture dish; *in vivo*: rats within a litter), often violate the independent observation  
30 assumption underlying many traditional statistical techniques. Although previous studies have  
31 empirically evaluated the analytic challenges associated with multilevel data, existing work has  
32 not focused on key parameters and design components typically observed in preclinical research.  
33 To address this knowledge gap, a Monte Carlo simulation study was conducted to systematically  
34 assess the effects of inappropriately modeling multilevel data via a fixed effects ANOVA in studies  
35 with sparse observations, no between group comparison within a single cluster, and interactive  
36 effects. Simulation results revealed a dramatic increase in the probability of type 1 error and  
37 relative bias of the standard error as the number of level-1 (e.g., cells; rats) units per cell increased  
38 in the fixed effects ANOVA; these effects were largely attenuated when the nesting was  
39 appropriately accounted for via a random effects ANOVA. Thus, failure to account for a nested  
40 experimental design may lead to reproducibility challenges and inaccurate conclusions.  
41 Appropriately accounting for multilevel data, however, may enhance statistical reliability, thereby  
42 leading to improvements in translatability. Valid analytic strategies are provided for a variety of  
43 design scenarios.

## 44 Introduction

45 Preclinical studies, which range from molecular and *in vitro* studies to *in vivo* studies  
46 utilizing biological systems to model disease [1], are not immune [2-3] from the well-documented  
47 reproducibility issues observed in clinical fields [4]. Various factors, including rigorous  
48 standardization of preclinical experiments [e.g., 5-6], lack of scientific rigor [e.g., 7-8], and bias  
49 [e.g., Publication Bias: 9-10; Reporting Bias: 11], threaten reproducibility in preclinical science.  
50 Moreover, utilization of inappropriate statistical techniques is pervasive in the basic biological  
51 sciences [12-13]; a factor that likely exacerbates the reproducibility crisis.

52 Although statistical analyses have become an essential component of scientific  
53 publications [14], basic scientists receive limited training in experimental design and quantitative  
54 methodology [14-15]. When doctoral curriculums include training in statistics, introductory  
55 courses primarily focus on traditional quantitative techniques (e.g., analysis of variance; ANOVA),  
56 but often fail to cover specialized statistical methods that are integral to contemporary research  
57 [e.g., multilevel modeling; 16]. For example, clustered data (e.g., *in vitro*: cells within a culture  
58 dish; *in vivo*: rats within a litter; see Fig 1), which are prevalent in preclinical research [17-18],  
59 often violate the independent observation assumption underlying many traditional statistical  
60 techniques (e.g., *t*-tests, ANOVA). Multilevel modeling [also called hierarchical linear modeling;  
61 19], however, appropriately accounts for the shared variance in nested data, thereby precluding  
62 violations of the independent observation assumption. For nearly fifty years [20-22], preclinical  
63 scientists have recognized the importance of appropriately defining the experimental unit, and yet  
64 a majority of preclinical studies continue to inappropriately analyze clustered data [e.g., Animal  
65 Models: 23-25, Developmental Psychobiology: 18, Neuroscience: 17].

### 66 **Fig 1. Examples of nested data commonly observed in preclinical studies.**

67 Nested data occurs when multiple subjects and/or measurements are obtained from a single  
68 higher-order group. Examples of nested data range from *in vitro* experiments (i.e., cells within a  
69 culture dish **(A)**) to *in vivo* experiments utilizing polytocus species (e.g., rat pups within a litter  
70 **(B)**). Multilevel data can also occur with the use of longitudinal experimental designs (i.e.,

71 repeated measurements are taken from a single individuals (**C**) or the classical Sholl analysis  
72 (i.e., radii are nested within a neuron (**D**); [62-63]).

73         Within preclinical fields, simulation studies have afforded an opportunity to empirically  
74 evaluate the implications of inappropriately modeling clustered data [e.g., 17-18, 26-28].  
75 Spuriously significant effects, evidenced by inflated type 1 error rates [17-18, 26-28], are a well-  
76 recognized consequence of inappropriately modeling clustered data. With regards to statistical  
77 power, higher intraclass correlation coefficients (ICC; i.e., the relatedness of nested data [29-30])  
78 are associated with lower statistical power [17]. To date, however, the majority of work examining  
79 statistical implications of violating the independent observation assumption has primarily  
80 considered parameters and design components not well aligned with those observed in preclinical  
81 studies (i.e., overly large sample and cluster size), as well as simplified models that preclude the  
82 examination of interactive effects. Moreover, the effect of inappropriately modeling multilevel data  
83 on the statistical accuracy of parameter estimates has not yet been systematically evaluated  
84 under these conditions.

85         In light of gaps in previous work, a Monte Carlo simulation study was conducted to  
86 empirically evaluate the effects of inappropriately modeling multilevel data using parameters more  
87 reflective of preclinical work. Specifically, the study considered: 1) sparse data, defined by either  
88 a small number of level-1 units per cell [31] or a small number of clusters; 2) no between group  
89 comparison within clusters, and 3) interactive effects. The rationale of including the latter derives  
90 from requirements by the National Institutes of Health to include sex as a biological variable (NOT-  
91 OD-15-102). Population data in line with a fully-crossed two-factor ANOVA, where treatment units  
92 were nested within clusters, was simulated to consider the impact on both main effects (e.g.,  
93 treatment and sex) and interaction terms (e.g., treatment x sex). Study outcomes were compared  
94 across a traditionally-used fixed effects ANOVA model and a two-level random effects ANOVA  
95 model that allowed variation in both the intercept and slope. Outcome variables were selected to  
96 assess both the accuracy of hypothesis testing and parameter estimates in the model. Valid

97 analytic strategies are provided for a variety of design scenarios. Given the current rigor and  
98 reproducibility crisis in the biomedical sciences, evaluating the implications of inappropriate  
99 statistical practices is integral to the quest for more efficient and reliable data.

## 100 Results

101 The population model in the simulation was a fully crossed 2x2 random effects ANOVA  
 102 model, with two binary predictors and an interaction term. Population parameters for level-1  
 103 sample size (i.e., number of level-1 units per cell;  $N$ ), level-2 sample size (i.e., number of clusters;  
 104  $C$ ), the parameter effect size for the main effect ( $\beta_1$ ), the parameter effect size for the interaction  
 105 effect ( $\beta_3$ ), and ICC were systematically varied yielding a 6 x 5 x 4 x 4 x 2 factorial design with  
 106 960 conditions (Table 1). Each condition was replicated 1,000 times, yielding 960,000 datasets  
 107 for analysis. Given the extremely large sample size, and corresponding inflation of statistical  
 108 significance, practical significance was evaluated against a partial  $\eta^2 \geq 0.01$  criterion, indicating  
 109 that at least 1% of the variance in a given outcome was attributable to the effect of interest [32].  
 110 The partial  $\eta^2$  values for each parameter, and all possible interactions among the parameters, are  
 111 presented for all outcome variables in Table 2 (Main Effect of  $\beta_1$ ) and Table 3 (Interaction Effect  
 112 of  $\beta_3$ ).

113 **Table 1. Simulation Population Parameters and Corresponding Levels of Each Parameter.**

| Population Parameter                       | Levels              |
|--------------------------------------------|---------------------|
| Sample Size: Level-1 ( $N$ )               | 2, 4, 6, 8, 10, 12  |
| Sample Size: Level-2 ( $C$ )               | 4, 8, 12, 16, 20    |
| Parameter Effect Size                      |                     |
| Main Effect of $\beta_1$ ( $\beta_1$ )     | 0, 0.14, 0.39, 0.59 |
| Interaction Effect $\beta_3$ ( $\beta_3$ ) | 0, 0.14, 0.39, 0.59 |
| Intraclass Correlation (ICC)               | 0.16, 0.6           |

114

115 **Table 2. Partial  $\eta^2$  for the Main Effect of  $\beta_1$ .**

| Outcome Measurement |        | $N$          | $C$          | ICC          | $\beta_1$    | $N \times C$ | $N \times$<br>ICC | $N \times \beta_1$ | $C \times$<br>ICC | $C \times \beta_1$ | ICC $\times$<br>$\beta_1$ |
|---------------------|--------|--------------|--------------|--------------|--------------|--------------|-------------------|--------------------|-------------------|--------------------|---------------------------|
| Type 1 Error        | Fixed  | <b>0.464</b> | 0.006        | <b>0.445</b> | ----         | 0.001        | <b>0.073</b>      | ----               | 0.003             | ----               | ----                      |
|                     | Random | <b>0.046</b> | <b>0.386</b> | <b>0.204</b> | ----         | <b>0.025</b> | <b>0.026</b>      | ----               | <b>0.194</b>      | ----               | ----                      |
| Power               | Fixed  | <b>0.013</b> | <b>0.045</b> | <b>0.504</b> | <b>0.235</b> | 0.001        | <b>0.010</b>      | 0.003              | <b>0.021</b>      | 0.008              | <b>0.141</b>              |
|                     | Random | <b>0.012</b> | <b>0.058</b> | <b>0.442</b> | <b>0.228</b> | <0.001       | <b>0.011</b>      | 0.003              | <b>0.041</b>      | <b>0.017</b>       | <b>0.168</b>              |
| Relative Bias       | Fixed  | <b>0.016</b> | 0.009        | 0.001        | 0.002        | <b>0.021</b> | 0.008             | <b>0.023</b>       | 0.006             | <b>0.010</b>       | 0.003                     |
|                     | Random | <b>0.015</b> | <b>0.012</b> | 0.001        | 0.002        | <b>0.018</b> | 0.008             | <b>0.020</b>       | 0.008             | <b>0.016</b>       | 0.002                     |
| Bias                | Fixed  | 0.009        | <b>0.033</b> | <b>0.01</b>  | ----         | <b>0.119</b> | 0.004             | ----               | <b>0.017</b>      | ----               | ----                      |
|                     | Random | 0.008        | <b>0.040</b> | 0.006        | ----         | <b>0.121</b> | 0.004             | ----               | <b>0.018</b>      | ----               | ----                      |

|                                     |              |                              |                |                              |                 |                        |                              |                 |                       |                 |                  |
|-------------------------------------|--------------|------------------------------|----------------|------------------------------|-----------------|------------------------|------------------------------|-----------------|-----------------------|-----------------|------------------|
| Relative Bias of the Standard Error | Fixed Random | <b>0.590</b><br><b>0.054</b> | 0.005<br>0.004 | <b>0.374</b><br><b>0.311</b> | <0.001<br>0.004 | <0.001<br><b>0.012</b> | <b>0.023</b><br><b>0.038</b> | <0.001<br>0.004 | 0.001<br><b>0.212</b> | <0.001<br>0.008 | <0.001<br><0.001 |
|-------------------------------------|--------------|------------------------------|----------------|------------------------------|-----------------|------------------------|------------------------------|-----------------|-----------------------|-----------------|------------------|

116 Practically significant effects are indicated by boldface type.

117 **Table 3. Partial  $\eta^2$  for the Main Effect of  $\beta_3$ .**

| Outcome Measurement                 |        | <i>N</i>     | <i>C</i>     | ICC          | $\beta_3$    | <i>N</i> x <i>C</i> | <i>N</i> x ICC | <i>N</i> x $\beta_3$ | <i>C</i> x ICC | <i>C</i> x $\beta_3$ |
|-------------------------------------|--------|--------------|--------------|--------------|--------------|---------------------|----------------|----------------------|----------------|----------------------|
| Type 1 Error                        | Fixed  | <b>0.602</b> | <b>0.040</b> | <b>0.109</b> | ----         | 0.008               | <b>0.197</b>   | ----                 | <b>0.018</b>   | ----                 |
|                                     | Random | <b>0.027</b> | <b>0.105</b> | <b>0.555</b> | ----         | <b>0.013</b>        | 0.004          | ----                 | <b>0.203</b>   | ----                 |
| Power                               | Fixed  | <b>0.067</b> | <b>0.064</b> | <b>0.309</b> | <b>0.233</b> | 0.006               | <b>0.038</b>   | <b>0.028</b>         | <b>0.040</b>   | <b>0.028</b>         |
|                                     | Random | <b>0.042</b> | <b>0.082</b> | <b>0.285</b> | <b>0.235</b> | 0.006               | <b>0.039</b>   | <b>0.019</b>         | <b>0.054</b>   | <b>0.039</b>         |
| Relative Bias                       | Fixed  | 0.004        | 0.004        | <0.001       | <0.001       | <b>0.014</b>        | 0.007          | <b>0.020</b>         | 0.004          | 0.004                |
|                                     | Random | 0.003        | 0.003        | <0.001       | <0.001       | <b>0.020</b>        | 0.006          | <b>0.018</b>         | 0.003          | 0.003                |
| Bias                                | Fixed  | <b>0.023</b> | <b>0.013</b> | 0.004        | ----         | <b>0.077</b>        | <b>0.013</b>   | ----                 | <b>0.019</b>   | ----                 |
|                                     | Random | <b>0.018</b> | <b>0.023</b> | 0.004        | ----         | <b>0.077</b>        | <b>0.014</b>   | ----                 | <b>0.019</b>   | ----                 |
| Relative Bias of the Standard Error | Fixed  | <b>0.684</b> | <b>0.012</b> | 0.002        | <0.001       | <0.001              | <b>0.286</b>   | <0.001               | 0.005          | <0.001               |
|                                     | Random | <b>0.026</b> | <b>0.050</b> | <b>0.577</b> | 0.002        | 0.005               | <b>0.011</b>   | 0.003                | <b>0.187</b>   | 0.003                |

118 Practically significant effects are indicated by boldface type.

### 119 Type 1 error

120 For experimental conditions where the population value of interest (i.e.,  $\beta_1, \beta_3$ ) was zero,  
 121 the accuracy of hypothesis testing was evaluated using type 1 error, which was defined as the  
 122 proportion of replications in a given condition that yielded statistically significant results. Type 1  
 123 error was evaluated against a nominal  $\alpha$  criterion of 0.05.

124 **Main effect ( $\beta_1$ ).** For the main effect of  $\beta_1$  in the fixed effects model (Fig 2A), the  
 125 probability of type 1 error ranged from 5.8% to 23.3% for the small ICC and from 10.3% to 49.8%  
 126 for the large ICC. The probability of type 1 error rates increased as the number of level-1 units  
 127 per cell increased, but the rate of increase was dependent upon ICC [*N* x ICC Interaction:  
 128  $\eta_p^2=0.073$ ]. Specifically, the probability of type 1 error increased at a significantly greater rate  
 129 when the ICC was large relative to a small ICC [First Order Polynomial:  $R^2s>0.91$ ;  
 130  $F(1,236)=351.1, p\leq 0.001$ ]. Most critically, however, observed type 1 error rates were greater than  
 131 the established  $\alpha$  criterion of 0.05 across all levels of the population parameters (i.e., *N* and ICC).

### 132 Fig 2. Probability of type 1 error.

133 The probability of type 1 error (%) is illustrated as a function of  $\beta$  coefficient (i.e., Main Effect of  
 134  $\beta_1$ : **A, B**; Interaction Effect of  $\beta_3$ : **C, D**), analytic approach (i.e., Fixed Effects ANOVA: **A, C**;

135 Random Effects ANOVA: **B, D**), and intraclass correlation (ICC). In the fixed effects ANOVA (**A, C**),  
136 mean estimates for the probability of type 1 error increased as the number of level-1 units per cell  
137 increased; estimates which were greater than the established  $\alpha$  criterion of 0.05. Utilization of a  
138 random effects ANOVA (**B, D**), however, improved the accuracy of hypothesis testing evidenced  
139 by type 1 error rates that approximate the established  $\alpha$  criterion. The dashed blue line reflects  
140 the established  $\alpha$  criterion of 0.05.

141 When the nested experimental design was appropriately accounted for via a random  
142 effects model, elevated type 1 error rates were largely attenuated (Fig 2B). In the random effects  
143 model, mean type 1 error rates ranged from 6% to 7.3% for the small ICC and from 6.3% to 13.2%  
144 for the large ICC; these values were dependent upon an interaction between the number of level-2  
145 units and ICC [ $C \times ICC$  Interaction:  $\eta_p^2=0.194$ ]. Specifically, the probability of type 1 error  
146 decreased at a significantly faster rate when the ICC was large relative to a small ICC [First Order  
147 Polynomial:  $R^2s>0.83$ ;  $F(1, 236)=112$ ,  $p\leq 0.001$ ].

148 **Interaction effect ( $\beta_3$ )**. With regard to the interaction effect of  $\beta_3$  in the fixed effects  
149 model (Fig 2C), mean estimates for type 1 error ranged from 3.3% to 8.3% for the small ICC and  
150 from 0.5% to 18.7% for the large ICC. Consistent with observations for  $\beta_1$ , mean estimates for the  
151 probability of type 1 error were dependent upon an interaction between the number of level-1  
152 units per cell and the value of the ICC [ $N \times ICC$  Interaction:  $\eta_p^2=0.197$ ]. Specifically, as the number  
153 of level-1 units per cell increased, the probability of type 1 error increased; an increase that was  
154 significantly faster when the ICC was large relative to a small ICC [First Order Polynomial:  
155  $R^2s>0.99$ ;  $F(1, 236)=490.7$ ,  $p\leq 0.001$ ]. Type 1 error rates were conservative when there were only  
156 two level-1 units per cell. There was diminished accuracy of hypothesis testing when more than  
157 four level-1 units per cell were selected, however, evidenced by a type 1 error rate that was  
158 greater than the established  $\alpha$  criterion of 0.05.

159 Utilization of a random effects model, to appropriately account for the nested experimental  
160 design, largely attenuated the elevated type 1 error rates for the interaction effect of  $\beta_3$  (Fig 2D).  
161 When the ICC was small, mean estimates for the probability of type 1 error in the random effects  
162 model ranged from 3.8% to 4.8%; observations which support accurate estimates across all level-



163 2 population parameters. For the large ICC, mean estimates for the probability of type 1 error in  
164 the random effects model ranged from 6.3% to 11.7%; observations which revealed a greater  
165 probability of type 1 error when fewer level-2 units per cell were sampled. The overall ANOVA  
166 confirmed our observations, revealing a practically significant interaction between the number of  
167 level-2 units and the ICC [C x ICC Interaction:  $\eta_p^2=0.203$ ].

## 168 **Power**

169 For experimental conditions where the population value of interest (i.e.,  $\beta_1$ ,  $\beta_3$ ) was non-  
170 zero, the accuracy of hypothesis testing was assessed via statistical power, which was defined  
171 by the proportion of replications in a given condition that yielded statistically significant results.  
172 Statistical power was evaluated against a criterion of 0.80 [32].

173 **Main effect ( $\beta_1$ ).** With regard to the main effect of  $\beta_1$  in the fixed effects model (Fig 3A),  
174 statistical power ranged from 12.2% to 73.8% for the small ICC and from 0.03% to 8.8% for the  
175 large ICC. A practically significant interaction between the magnitude of  $\beta_1$  and ICC was observed  
176 [ $\beta_1$  x ICC Interaction:  $\eta_p^2=0.141$ ]. As the magnitude of  $\beta_1$  increased, statistical power increased;  
177 an increase that was significantly faster when the ICC was small relative to a large ICC [First  
178 Order Polynomial:  $R^2s>0.97$ ;  $F(1,716)=734.5$ ,  $p\leq 0.001$ ]. However, the observed statistical power  
179 failed to reach the established criterion of 0.80 at any levels of the population parameters studied.

## 180 **Fig 3. Statistical power.**

181 Statistical power is illustrated as a function of coefficient magnitude (i.e., 0.14, 0.39, 0.59),  $\beta$   
182 coefficient (i.e., Main Effect of  $\beta_1$ : **A, B**; Interaction Effect of  $\beta_3$ : **C, D**), analytic approach (i.e., Fixed  
183 Effects ANOVA: **A,C**; Random Effects ANOVA: **B,D**), and intraclass correlation (ICC).  
184 Independent of analytic approach and/or  $\beta$  coefficient, statistical power failed to reach the  
185 established criterion of 0.80. Overall, statistical power was lower for the interaction effect of  $\beta_3$ .  
186 The dashed blue line reflects the established criterion of 0.80.

187 Utilizing a random effects model to appropriately account for the nested experimental  
188 design did not significantly improve the statistical power to detect effects. In the random effects  
189 model, statistical power ranged from 7.8% to 74.6% for the small ICC and from 0.03% to 5.6% for  
190 the large ICC (Fig 3B); these estimates were dependent upon an interaction between the

191 magnitude of  $\beta_1$  and ICC [ $\beta_1$  x ICC Interaction:  $\eta_p^2=0.168$ ]. Consistent with observations for the  
192 fixed effects ANOVA, statistical power to detect the main effect of  $\beta_1$  increased at a significantly  
193 faster rate when the ICC was small relative to a large ICC [First Order Polynomial:  $R^2s>0.97$ ;  $F(1,$   
194  $716)=720.2$ ,  $p\leq 0.001$ ]. Although statistical power failed to reach the established criterion of 0.80  
195 in the random effects model, it is noteworthy that the utilization of an appropriate, advanced  
196 quantitative method had no adverse effects (i.e., did not decrease) on statistical power.

197 **Interaction effect ( $\beta_3$ ).** For the interaction effect in the fixed effects model (Fig 3C),  
198 statistical power ranged from 3.8% to 53.6% for the small ICC and from 0% to 5.7% for the large  
199 ICC. These estimates were dependent upon an interaction between the magnitude of  $\beta_3$  and the  
200 ICC [ $\beta_3$  x ICC Interaction:  $\eta_p^2=0.150$ ] and were lower for the interaction effect of  $\beta_3$  relative to the  
201 main effect of  $\beta_1$ . As the magnitude of  $\beta_3$  increased, statistical power increased; an increase that  
202 was significantly faster when the ICC was small relative to a large ICC [First Order Polynomial:  
203  $R^2s>0.97$ ;  $F(1, 716)=345.2$ ,  $p\leq 0.001$ ].

204 Utilization of a random effects model to appropriately account for the nested experimental  
205 design did not increase statistical power to detect effects. In the random effects model, statistical  
206 power ranged from 3.1% to 50% for the small ICC and from 0% to 5.5% for the large ICC (Fig  
207 3D). Consistent with observations for the interaction effect of  $\beta_3$  in the fixed effects model,  
208 statistical power was dependent upon an interaction between the magnitude of  $\beta_3$  and ICC [ $\beta_3$  x  
209 ICC Interaction:  $\eta_p^2=0.150$ ]. Statistical power increased at a significantly faster rate when the ICC  
210 was small relative to a large ICC [First Order Polynomial:  $R^2s>0.96$ ;  $F(1, 716)=318.5$ ,  $p\leq 0.001$ ].  
211 Consistent with observations for  $\beta_1$ , statistical power for the interaction effect of  $\beta_3$  failed to reach  
212 the established criterion of 0.80 in either the fixed effects model or the random effects model;  
213 results that suggest preclinical studies may often be underpowered, resulting in decreased  
214 accuracy for hypothesis testing.

215

## 216 **Relative bias of parameter estimates**

217 For conditions where the parameter effect size of interest (i.e.,  $\beta_1$ ,  $\beta_3$ ) was non-zero, the  
218 relative bias of parameter estimates was evaluated to assess the accuracy of model parameter  
219 estimates. Relative bias was defined as the difference between the observed sample estimate  
220 and the true value of a given parameter, relative to the true value of the parameter being  
221 estimated:

$$222 \quad \widehat{RB}_\theta = \frac{\hat{\theta} - \theta}{\theta}$$

223 where  $\hat{\theta}$  is the average parameter estimate across 1000 replications and  $\theta$  refers to the population  
224 parameter value. Values of relative bias that exceeded  $|10\%|$  were considered poor [33].

225 **Main effect ( $\beta_1$ ).** For the main effect of  $\beta_1$ , a practically significant four-way interaction  
226 between the number of level-1 units per cell, the number of level-2 units, the magnitude of  $\beta_1$ , and  
227 ICC [ $N \times C \times \beta_1 \times \text{ICC}$  Interaction:  $\eta_p^2=0.043$ ] was observed in the fixed effects model. Under  
228 conditions where the ICC was small, results demonstrated tolerable rates of relative bias across  
229 varying values of  $\beta_1$ , with mean estimates for relative bias ranging from -6.6% to 7.2% when  
230  $\beta_1=0.14$ , from -5.7% to 1.6% when  $\beta_1=0.39$ , and from -1.7% to 2.1% when  $\beta_1=0.59$ . For the large  
231 ICC (Fig 4A, 4C, 4E), however, excessive rates of bias were observed under conditions when the  
232 magnitude of  $\beta_1$  was small. Specifically, mean estimates for relative bias ranged from -21.2% to  
233 38% when  $\beta_1=0.14$ . This contrasted to relative bias estimates in the large ICC conditions when  $\beta_1$   
234 was either medium (0.39) or large (0.59), with relative bias estimates ranging from -5.8% to 8.7%  
235 and from -6.5% to 6.9%, respectively. Overall, the pattern of relative bias was random, centered  
236 around zero, and did not consistently exceed the established criterion of  $|10\%|$  in these conditions.

237

238

239 **Fig 4. Relative bias of parameter estimates.**

240 Relative bias (%) is illustrated for the main effect of  $\beta_1$  and the large intraclass correlation as a  
241 function of coefficient magnitude (i.e., 0.14 (**A, B**), 0.39 (**C, D**), 0.59 (**E, F**)), analytic approach  
242 (i.e., Fixed Effects ANOVA: **A, C, E**; Random Effects ANOVA: **B, D, F**), the number of level-1  
243 units per cell, and the number of level-2 units. Independent of analytic approach, elevated rates  
244 of relative bias were observed for some conditions when the magnitude of  $\beta_1$  was small (**A,B**).  
245 Overall, however, the pattern of relative bias was random, centered around zero, and not  
246 consistently exceed the established criterion of  $|10\%|$  for either the fixed effects or random effects  
247 ANOVA. The green area within the two dashed blue lines reflects the acceptable levels of relative  
248 bias. Points outside of the green area are greater than the established criterion of  $|10\%|$ .

249 With regard to the main effect of  $\beta_1$  in the random effects model, a practically significant  
250 four-way interaction between the number of level-1 units per cell, the number of level-2 units, the  
251 magnitude of  $\beta_1$ , and ICC [ $N \times C \times \beta_1 \times \text{ICC}$  Interaction:  $\eta_p^2=0.041$ ] was also observed. For the  
252 small ICC, results demonstrated tolerable rates of relative bias across values of  $\beta_1$ , with mean  
253 estimates for relative bias ranging from -6.6% to 7.3% when  $\beta_1=0.14$  from -3.1% to 1.9% when  
254  $\beta_1=0.39$ , and from -1.4% to 2.2% when  $\beta_1=0.59$ . Under parameter conditions where the ICC was  
255 large (Fig 4B, 4D, 4F), results demonstrated intolerable relative bias when the magnitude of  $\beta_1$   
256 was small, with estimates ranging from -16.5% to 37.9%. This contrasted to relative bias  
257 estimates when the magnitude of  $\beta_1$  was either medium (0.39) or large (0.59) in these conditions,  
258 with relative bias estimates ranging from -5.7% to 8.7% and from -8.4% to 2.7%, respectively.  
259 The comparability of relative bias results across the random effects and fixed effects models  
260 indicate neither a beneficial nor detrimental effect of appropriately modeling nested data on the  
261 relative bias of model parameter estimates.

262 **Interaction effect ( $\beta_3$ ).** For the interaction effect of  $\beta_3$ , a practically significant four-way  
263 interaction between the number of level-1 units per cell, the number of level-2 units, the magnitude  
264 of  $\beta_3$ , and ICC [ $N \times C \times \beta_3 \times \text{ICC}$  Interaction:  $\eta_p^2=0.033$ ] was observed in the fixed effects model.  
265 When  $\beta_3=0.14$ , mean estimates for relative bias ranged from -17.8% to 11.1% and from -23.4%  
266 to 21.3% for the small ICC and large ICC, respectively. When  $\beta_3=0.39$ , mean estimates for relative  
267 bias ranged from -2.0% to 1.9% for the small ICC and from -8.4% to 8.6% for the large ICC.  
268 Finally, when  $\beta_3=0.59$ , mean estimates for relative bias ranged from -1.8% to 1.3% and from -

269 5.4% to 11.7% for the small ICC and large ICC, respectively. Overall, relative bias did not  
270 consistently exceed the established criterion of |10%|. Notably, however, there were excessive  
271 rates of relative bias when the magnitude of the interaction term was small.

272 Mean estimates for relative bias for the interaction effect of  $\beta_3$  in the random effects model  
273 approximated those observed in the fixed effects model. Furthermore, consistent with  
274 observations for the interaction effect of  $\beta_3$  in the fixed effects ANOVA, a practically significant  
275 interaction between the number of level-1 units per cell, the number of level-2 units, the magnitude  
276 of  $\beta_3$ , and the ICC was observed [ $N \times C \times \beta_3 \times \text{ICC Interaction: } \eta_p^2=0.030$ ]. Specifically, for the  
277 small ICC, mean estimates for relative bias ranged from -23.9% to 10.6% when  $\beta_3=0.14$ , from -  
278 1.8% to 2.6% when  $\beta_3=0.39$ , and from -1.7% to 1.9% when  $\beta_3=0.59$ . Under parameter conditions  
279 where the ICC was large, mean estimates for relative bias ranged from -23.4% to 20.5% when  
280  $\beta_3=0.14$ , from -8.3% to 9.8% when  $\beta_3=0.39$ , and from -5.7% to 11.6% when  $\beta_3=0.59$ . As with  
281 results for the fixed effects model, there was a modest elevation of relative bias when the  
282 magnitude of the interaction term was small. Overall however, and consistent with observations  
283 for  $\beta_1$ , relative bias for the interaction effect of  $\beta_3$  did not consistently exceed the established  
284 criterion of |10%| in either the fixed effects model or the random effects model.

### 285 **Absolute bias of parameter estimates**

286 When relative bias was undefined in experimental conditions (i.e., when true values of the  
287 parameter effect size of the  $\beta$  coefficients were equal to zero), absolute bias was calculated as  
288 follows:

$$289 \hat{B}_\theta = \hat{\theta} - \theta$$

290 Values of absolute bias that exceeded |10%| were considered poor [33].

291 **Main Effect ( $\beta_1$ ).** For the main effect of  $\beta_1$  in the fixed effects model, mean estimates for  
292 absolute bias ranged from -0.8% to 1.3% for the small ICC and from -2.5% to 6.2% for the large

293 ICC. A practically significant interaction between the number of level-1 units per cell, the number  
294 of level-2 units, and ICC was observed [ $N \times C \times ICC$  Interaction:  $\eta_p^2=0.060$ ].

295 Utilizing a random effects model to appropriately account for the nested experimental  
296 design had neither a beneficial nor adverse effect on absolute bias. Consistent with observations  
297 for the main effect of  $\beta_1$  in the fixed effects ANOVA, a practically significant interaction between  
298 the number of level-1 units per cell, the number of level-2 units and ICC was observed [ $N \times C \times$   
299  $ICC$  Interaction:  $\eta_p^2=0.058$ ]. Specifically, for the small ICC, mean estimates for absolute bias  
300 ranged from -0.8% to 1.5%. For the large ICC, mean estimates for absolute bias ranged from -  
301 2.0% to 6.4% in the random effects ANOVA. Therefore, absolute bias did not exceed established  
302 criterion of |10%| for any conditions assessed in either the fixed effects ANOVA or the random  
303 effects ANOVA.

304 **Interaction Effect ( $\beta_3$ ).** With regards to the interaction effect of  $\beta_3$ , a practically  
305 significant three-way interaction between the number of level-1 units per cell, the number of level-  
306 2 units, and ICC [ $N \times C \times ICC$  Interaction:  $\eta_p^2=0.028$ ] was observed in the fixed effects model.  
307 Mean estimates for absolute bias ranged from -1.2% to 1.1% and from -2.3% to 1.8% for the small  
308 ICC and large ICC, respectively.

309 Utilizing a random effects model to appropriately account for the nested experimental  
310 design had neither a beneficial nor adverse effect on absolute bias. For the small ICC, mean  
311 estimates for absolute bias ranged from -1.1% to 1.1%. For the large ICC, mean estimates for  
312 absolute bias ranged from -3.7% to 1.1%. Consistent with observations for the main effect of  $\beta_1$ ,  
313 absolute bias for the interaction effect of  $\beta_3$  did not exceed the established criterion of |10%| for  
314 any conditions assessed in either the fixed effects ANOVA or the random effects ANOVA.

### 315 **Relative bias of the standard error**

316 Relative bias of the standard error was evaluated for all experimental conditions to  
317 examine the accuracy of error estimates using the following formula [34]:

318 
$$\widehat{RB}_{SE} = \frac{\overline{SE}_\sigma - sd_{\hat{\sigma}}}{sd_{\hat{\sigma}}}$$

319 where  $\overline{SE}_\sigma$  is the average standard error across replications and  $sd_{\hat{\sigma}}$  is the empirical standard  
320 deviation of parameter estimates. Values of relative bias of the standard error that were greater  
321 than  $|5\%|$  were considered poor [35].

322 **Main Effect ( $\beta_1$ ).** For the main effect of  $\beta_1$  in the fixed effects model (Fig 5A), results  
323 demonstrated intolerable levels of relative bias of the standard error across parameter  
324 combinations, ranging from -39.5% to -4.3% for the small ICC and from -65.2% to -14.8% for the  
325 large ICC. Mean estimates for relative bias of the standard error were dependent upon an  
326 interaction between the number of level-1 units per cell and ICC [ $N \times \text{ICC}$  Interaction:  $\eta_p^2=0.023$ ].  
327 A one-phase decay provided a well-described fit for the relative bias of the standard error,  
328 independent of ICC (Small ICC:  $R^2>0.99$ ; Large ICC:  $R^2>0.99$ ). However, significant differences  
329 in the y-intercept [ $F(1,954)=156.1, p\leq 0.001$ ], rate constant [i.e.,  $K$ ;  $F(1,954)=284.7, p\leq 0.001$ ] and  
330 plateau [ $F(1,954)=106.4, p\leq 0.001$ ] were observed. When failing to account for the nested data  
331 structure, the standard error for the main effect of  $\beta_1$  was negatively biased.

332 **Fig 5. Relative bias of the standard error.**

333 Relative bias of the standard error (%) is illustrated as a function of  $\beta$  coefficient (i.e., Main Effect  
334 of  $\beta_1$ : **A, B**; Interaction Effect of  $\beta_3$ : **C, D**), analytic approach (i.e., Fixed Effects ANOVA: **A, C**;  
335 Random Effects ANOVA: **B, D**), and intraclass correlation (ICC). In the fixed effects ANOVA (**A,C**),  
336 mean estimates for the relative bias of the standard error decreased as the number of level-1  
337 units per cell increased supporting negatively biased standard errors. Utilization of a random  
338 effects ANOVA (**B,D**), however, largely attenuated the relative bias of the standard error; an effect  
339 which represents a disattenuation of the standard error. The green area within the two dashed  
340 blue lines reflects the acceptable levels of relative bias of the standard error. Points outside of the  
341 green area are greater than the established criterion of  $|5\%|$ .

342 When the nested experimental design was appropriately accounted for via a random  
343 effects model, however, the relative bias of the standard error was largely attenuated. When the  
344 ICC was small, mean estimates for the relative bias of the standard error in the random effects  
345 model ranged from 4% to -0.2%; estimates that were less than the established criterion of 5%  
346 across all level-2 units per cell. For the large ICC, mean estimates for the relative bias of the

347 standard error ranged from -6.6% to -1.4%; observations which revealed a greater likelihood of  
348 biased standard errors when fewer level-2 units were sampled (Fig 5B). The overall ANOVA  
349 confirmed our observations, revealing a practically significant interaction between the number of  
350 level-2 units and the ICC [C x ICC Interaction:  $\eta_p^2=0.212$ ]. Furthermore, an investigation of the  
351 empirical standard deviation of parameter estimates demonstrated negligible differences between  
352 the fixed effect models and random effect models across conditions. Thus, in line with previous  
353 methodological work, results demonstrated that utilization of a random effects model largely  
354 attenuated the relative bias of the standard error to approximate the established criterion of [5%];  
355 an effect resulting from the disattenuation of the standard error.

356 **Interaction Effect ( $\beta_3$ ).** For the interaction effect of  $\beta_3$  in the fixed effects model (Fig  
357 5C), mean estimates for the relative bias of the standard error ranged from 8.6% to -11.4% for  
358 the small ICC and from 58.9% to -31.1% for the large ICC. Overall, the relative bias of the standard  
359 error was greater when the ICC was large relative to a small ICC. A shift in the direction of the  
360 relative bias of the standard error (i.e., from positively biased to negatively biased) was observed  
361 as the number of level-1 units per cell increased, in line with increased violations of independence.  
362 A practically significant interaction between the number of level-1 units per cell and ICC confirmed  
363 our observations [N x ICC Interaction:  $\eta_p^2=0.286$ ]. A one-phase decay provided a well-described  
364 fit for the relative bias the standard error, independent of ICC (Small ICC:  $R^2>0.99$ ; Large ICC:  
365  $R^2>0.99$ ). However, significant differences in the y-intercept [ $F(1,954)=599.2, p\leq 0.001$ ], and rate  
366 constant [i.e., K;  $F(1,954)=93.0, p\leq 0.001$ ] were observed. Consistent with the observations for  $\beta_1$   
367 in the fixed effects model, when two or more level-1 units per cell were selected, there was  
368 diminished accuracy of standard error estimates.

369 Utilization of a random effects model to appropriately account for the nested experimental  
370 design, however, largely attenuated the relative bias of the standard error. In the random effects  
371 model, mean estimates for the relative bias of the standard error ranged from 14.6% to 3% for  
372 the small ICC and from -4.8% to -1.1% for the large ICC (Fig 5D). Independent of ICC, as the



373 number of level-2 units increased, the relative bias of the standard error approached 0. The  
374 practically significant interaction between the number of level-2 units and the ICC [C x ICC  
375 Interaction:  $\eta_p^2=0.187$ ] captures differences in the direction (i.e., Small ICC: positively biased;  
376 Large ICC: negatively biased) of relative bias of the standard error. Therefore, consistent with  
377 observations for  $\beta_1$ , utilization of a random effects model largely disattenuated the standard error  
378 and had a negligible effect on the empirical standard deviation of parameter estimates;  
379 observations which support the implementation of random effects models when nested data are  
380 present in a design.

## 381 Discussion

382 Inappropriately modeling clustered data via a fixed effects ANOVA promoted inaccurate  
383 hypothesis testing and artificially attenuated standard error estimates; both of these effects were  
384 largely mitigated when the nested data structure was appropriately accounted for via a random  
385 effects ANOVA. Spuriously significant effects, evidenced by type 1 error rates greater than the  
386 established  $\alpha$  criterion of 0.05, were observed in the fixed effects ANOVA. Significant negatively  
387 biased standard errors, which artificially decrease estimates of the standard error, promoted  
388 inaccurate hypothesis testing in the fixed effects ANOVA. Notably, inappropriately modeling  
389 nested data had adverse effects on both the main effect of  $\beta_1$  and the interaction effect of  $\beta_3$ ;  
390 albeit the magnitude of these effects was dependent upon the  $\beta$  coefficient (i.e.,  $\beta_1$  or  $\beta_3$ ) and  
391 outcome variable of interest. In contrast, appropriately modeling nested data via a random effects  
392 ANOVA improved the accuracy of both hypothesis testing (i.e., Type 1 Error) and parameter  
393 estimates (i.e., Relative Bias of the Standard Error). Statistical power failed to reach the  
394 established criterion of 0.8 in either the fixed effects or random effects ANOVA; a result reflecting  
395 the small sample sizes commonly utilized in preclinical research. Thus, failure to account for a  
396 nested experimental design has critical implications on inferential statistics and may hinder  
397 reproducibility in the behavioral and biomedical sciences.

398 Selection of two or more level-1 units per cell has prominent adverse effects on inferential  
399 statistics when analytic techniques fail to account for the nested data structure. Consistent with  
400 previous methodological work [e.g., 17-18, 26-28, 36-38], type 1 error rates were greater than the  
401 established  $\alpha$  criterion of 0.05 in the fixed effects ANOVA; results which demonstrate that findings  
402 based on larger samples, different design characterizations, and simpler models (i.e., *t*-tests)  
403 extend to the types of parameters more commonly seen in preclinical studies. Notably, the  
404 profound negative bias in the standard error, which occurs even when the number of level-1 units  
405 per cell is small, likely promotes elevated type 1 error rates in the fixed effects ANOVA by  
406 decreasing within-group variance. When multilevel data is appropriately modeled via a random

407 effects ANOVA, however, the type 1 error rate and relative bias of the standard error approximate  
408 the established criterion (i.e.,  $\alpha < 0.05$  and |5%|, respectively).

409 Low statistical power has been recognized as a critical, albeit not universal, issue in  
410 preclinical research [39-40]. In the present simulation, statistical power failed to reach the  
411 established criterion of 0.8 in either the fixed effects or random effects ANOVA; a result reflecting  
412 the small level-1 and level-2 sample sizes modeled to reflect those commonly observed in  
413 preclinical studies [41-42]. To maximize statistical power in a nested experimental design,  
414 methodologists recommend increasing the number of level-2 units, rather than the number of  
415 level-1 units per cell [e.g., 28, 43]. However, given feasibility issues (e.g., time, cost) with  
416 increasing sample size, it is important to consider utilizing alternative experimental design  
417 strategies, including repeated-measures [44], the inclusion of covariates [45-47], and use of no  
418 dependent observations [18], to increase statistical power. Implementation of these strategies is  
419 especially important in light of requirements by the NIH to include sex as a biological variable  
420 (NOT-OD-15-102); a requirement that necessitates investigation of interaction terms, which  
421 exhibit lower statistical power than main effects.

422 The assessment of two ICC variants revealed the importance of the value of ICC across  
423 all outcome measures. Specifically, in the fixed effects ANOVA, the value of ICC altered the  
424 magnitude, but not the presence, of inaccurate hypothesis testing and parameter estimates. The  
425 importance of calculating and reporting the ICC in preclinical studies, therefore, cannot be  
426 understated. ICC (i.e.,  $\rho$ ; [29-30]), which reflects the relatedness of nested data, is calculated by  
427 dividing the between-cluster variability by the total variability (i.e., within-cluster variability and  
428 between-cluster variability; [19]). Values of ICC range from zero to one, whereby, a higher ICC  
429 represents increased similarity within a cluster. Given that even small ICC values (i.e.,  $\rho < 0.05$ )  
430 may have critical implications on inferential statistics [48-49], researchers should also conduct a  
431 formal statistical test to determine whether the ICC is statistically significant. Winer [50] and

432 Denenberg 51] proposed a preliminary test to calculate an  $F$  ratio by dividing the mean using the  
433 following equation:

$$434 \quad F = \frac{MS_{cluster}}{MS_{subject}}$$

435 To assess statistical significance, Winer [50] recommended establishing a relatively high  $\alpha$   
436 criterion (i.e., 0.20 to 0.30). Generally, however, and in the absence of calculating and testing  
437 model ICCs to suggest otherwise, the nested data structure should be modeled using an  
438 appropriate analytic technique.

439 Our study considered the utility of a random effects ANOVA to appropriately account for  
440 nested data. Cluster means, an approach historically recommended for handling nested data in  
441 preclinical research [e.g., 21-22], however, merit further consideration. Cluster means are an  
442 inherently simple approach by which multiple observations within a cluster are reduced to a single,  
443 independent observation via the calculation of a summary statistic (e.g., mean; [27, 51]). The  
444 validity of cluster means is evidenced by their ability to effectively reduce the probability of type 1  
445 error [18, 27-28]; albeit further research is needed to assess their utility in studies with more  
446 complex statistical analyses (i.e., ANOVA). However, when both the number of level-2 units and  
447 effect size is small [28], researchers should be cautious about implementing cluster means, as  
448 this approach may decrease statistical power.

449 Generalized estimating equations [GEE; 52] offer another analytic approach for multilevel  
450 data. In GEE, statistical corrections are utilized to produce standard error estimates via a  
451 ‘sandwich’ estimator, and in some cases parameter estimates, that account for the nested  
452 experimental design [52-53]. Unlike ANOVA techniques, GEE are appropriate for non-normal,  
453 binary, and categorical dependent variables. When the number of level-2 units is large, compelling  
454 evidence for unbiased parameter and standard error estimates supports the validity of GEE for  
455 the analysis of clustered data [e.g., 54-56]. However, when the number of level-2 units is small,

456 as is commonly seen in preclinical studies, GEE are too liberal (i.e., increased type-1 error rates,  
457 negatively biased standard errors; [e.g., 27, 56-57]). Furthermore, GEE are strictly a population-  
458 level modeling approach, which precludes cluster-specific inferences. Thus, although GEE afford  
459 a valid approach for modeling multilevel data, they may be impractical for preclinical studies.

460 Methodological advancements and widely available statistical software packages (e.g.,  
461 SAT/STAT Software 9.4; SPSS Statistics 26, IBM Corp.) have made appropriately modeling  
462 multilevel data readily accessible. Fig 6 offers a recommendation for determining an appropriate  
463 statistical approach for the analysis of multilevel data in preclinical studies. Specifically,  
464 researchers should begin by calculating ICC and conducting a preliminary statistical test  
465 evaluated against a relatively high  $\alpha$  criterion (i.e., 0.20 to 0.30; [50-51]). If the ICC is not  
466 statistically significant, and the number of level-1 units per cell is small, scientists may conduct a  
467 fixed effects ANOVA. However, if the ICC is statistically significant, we recommend accounting  
468 for the nested data structure using an appropriate analytic technique (e.g., random effects  
469 ANOVA, cluster means, GEE) and any necessary bias corrections (i.e., GEE with small-sample  
470 data; [58-59]).

471 **Fig 6. Recommendations for the selection of an appropriate analytic technique for**  
472 **clustered data.**

473 A statistical decision tree illustrates some of the key considerations for determining the most  
474 appropriate statistical technique for nested data. Critically, these recommendations are not  
475 exhaustive, and other statistical approaches may be appropriate dependent upon the research  
476 question. \*To conduct a fixed effects ANOVA, you will also want the number of level-1 units per  
477 cell to be small. #Low  $N$  in the presence of a large intraclass correlation likely indicates low  
478 statistical power. &For preclinical studies with small samples, bias corrections [58-59] may be  
479 necessary.

480 Taken together, the present simulation empirically demonstrates how the failure to  
481 account for a nested experimental design may threaten reproducibility in preclinical science.  
482 Appropriately accounting for multilevel data via a random effects ANOVA, however, improved the  
483 accuracy of both hypothesis testing and parameter estimates. Valid analytic strategies have been  
484 provided for a variety of design scenarios to aid in the selection of appropriate statistical

485 techniques for clustered data. Given the prevalence of clustered data in preclinical studies,  
486 increased awareness of the implications of inappropriately analyses will lead to enhanced  
487 efficiency and translatability.

## 489 **Methods**

### 490 **Experimental Design**

491 **Population model.** The population model in the simulation was a fully crossed 2x2  
492 random effects ANOVA model, with two binary predictors and an interaction term. The level-1  
493 random-coefficients model was defined as follows:

$$494 \quad Y_{ij} = \beta_{0j} + \beta_{1ij}X_{1ij} + \beta_{2ij}X_{2ij} + \beta_{3ij}(X_{1ij} * X_{2ij}) + r_{ij},$$

495 where  $\beta_{0j}$  is the intercept,  $\beta_{1ij}$  is a level-1 predictor (e.g., Treatment) relating  $X_{1ij}$  to  $Y_{ij}$ ,  $\beta_{2ij}$  is  
496 the regression coefficient relating  $X_{2ij}$ , a second level-1 predictor (e.g., Biological Sex), to  $Y_{ij}$ ,  
497  $\beta_{3ij}$  is the regression coefficient relating the interaction of the two level-1 predictors ( $X_{1ij} * X_{2ij}$ )  
498 to  $Y_{ij}$  and  $r_{ij}$  is the level-1 random effects.

499 All level-1 coefficients were permitted to randomly vary, yielding the following  
500 unconditional level-2 random-coefficient model equations:

$$501 \quad \beta_{0j} = \gamma_{00} + \mu_{0j}$$

$$502 \quad \beta_{1ij} = \gamma_{10} + \mu_{1j}$$

$$503 \quad \beta_{2ij} = \gamma_{20} + \mu_{2j}$$

$$504 \quad \beta_{3ij} = \gamma_{30} + \mu_{3j}$$

505 where  $\gamma_{00}$  is the average intercept across clusters and  $\gamma_{10}$ ,  $\gamma_{20}$ , and  $\gamma_{30}$  are the average  
506 regression slopes across those clusters, corresponding to each given predictor in level-1,  
507 respectively, and  $\mu_{0j}$ ,  $\mu_{1j}$ ,  $\mu_{2j}$ , and  $\mu_{3j}$  were the associated error terms for each equation.

508 **Data Generation.** Data for the binary predictors were generated based on a balanced  
509 cells design with an effects coding scheme of -.5 and .5 to center the variables. The level-1  
510 coefficients were generated from a multivariate normal distribution using the MASS package and  
511 `mvrnorm` function in R [60]. The mean structure (i.e., fixed effects) was manipulated according to  
512 different sizes of the coefficients. The covariances of the level-2 error terms were set to be zero.

513 The level 1 error term was generated from a normal distribution with a homogeneous variance  
514 across clusters (i.e.,  $r_{ij} \sim N(0, \sigma^2)$ ). Variances for both level-1 and level-2 error terms were  
515 manipulated to yield the target levels of ICC. The R Foundation for Statistical Computing (version  
516 3.4.1, Vienna, Austria) was utilized to conduct the statistical simulation. The detailed simulation  
517 conditions are summarized below.

518 **Simulation conditions.** Simulation conditions were selected to reflect varying level-1  
519 sample sizes ( $N$ ) and level-2 cluster sizes ( $C$ ) commonly observed in preclinical studies [41-42].  
520 The population value for the model intercept was set to zero. To investigate the impact of variably  
521 sized treatment effects, as well as varying size of the interaction between treatment effects and  
522 biological sex, parameter values for  $\beta_1$  and  $\beta_3$  were systematically varied as follows: Null (0), small  
523 (0.14), medium (0.39), and large (0.59) [32]. The parameter value of  $\beta_2$  was constrained to be  
524 0.14, to focus investigation on detecting variably sized treatment effects of the primary predictor  
525 and the interaction term.

526 Levels of ICC were manipulated by altering the variances of both level 1 and level 2 error  
527 terms. Two levels of ICCs were considered, including a small (0.16) and large (0.60) cluster effect.  
528 The ICCs were based on the unconditional model. It is noted that the ICC for a given condition  
529 may not be identical to the target values. For the small cluster effect, the population ICCs ranged  
530 from 0.152 to 0.166 across conditions. In terms of the large cluster effect, the population ICCs  
531 ranged from 0.590 to 0.604. Detailed information regarding the population values of the error  
532 variances and ICCs is provided in the supplementary materials.

### 533 **Statistical Analysis**

534 The nlme: Linear and Nonlinear Mixed Effects Models package [61] in R was used to  
535 estimate the random effects ANOVA model. The fixed effects ANOVA model was estimated using  
536 the glm function within the same package. A five-way 6 x 5 x 4 x 4 x 2 ANOVA was implemented  
537 for post-hoc analyses to analyze the influence of each parameter, and all possible interactions  
538 among the parameters, on outcome variables in the study. Given the extremely large sample



539 size, and corresponding inflation of statistical significance, partial  $\eta^2$  was utilized to evaluate the  
540 practical significance of effects in the study. Specifically, practical significance was evaluated  
541 against a partial  $\eta^2 \geq 0.01$  criterion, indicating that at least 1% of the variance in a given outcome  
542 was attributable to the effect of interest [32]. Post-hoc statistical analyses were conducted using  
543 SAS (SAS/STAT Software 9.4, SAS Institute, Inc., Cary, NC, USA). Regression analyses were  
544 conducted using GraphPad Prism 5 (GraphPad Software, Inc., La Jolla, CA, USA). Figures were  
545 created using GraphPad Prism 5 (GraphPad Software, Inc., La Jolla, CA, USA).

#### 546 **Code Accessibility**

547 All code utilized for the Monte Carlo Simulation is available upon request.

548

549

## 550 References

- 551 1. Steward O, Balice-Gordon R. Rigor or mortis: Best practices for preclinical research in  
552 neuroscience. *Neuron*. 2014; 84: 572-581.
- 553 2. Prinz F, Schlange T, Asadullah K. Believe it or not: How much can we rely on published  
554 data on potential drug targets? *Nat Rev Drug Discov*. 2011; 10: 712.
- 555 3. Begley CG, Ellis LM. Raise standards for preclinical cancer research. *Nature*. 2012; 483:  
556 531-533.
- 557 4. Camerer CF, Dreber A, Holzmeister F, Ho TH, Huber J, Johannesson M, et al.  
558 Evaluating the replicability of social science experiments in *Nature* and *Science* between  
559 2010 and 2015. *Nat Hum Behav*. 2018; 2: 637-644.
- 560 5. Crabbe JC, Wahlsten D, Dudek BC. Genetics of mouse behavior: Interactions with  
561 laboratory environment. *Science*. 1999; 284: 1670-1672.
- 562 6. Voelkl B, Vogt L, Sena ES, Würbel H. Reproducibility of preclinical animal research  
563 improves with heterogeneity of study samples. *PLoS Biol*. 2018; 16: e2003693.
- 564 7. Loken E, Gelman A. Measurement error and the replication crisis. *Science*. 2017; 355:  
565 584-585.
- 566 8. Larsson P, Engqvist H, Biermann J, Rönnerman EW, Forssell-Aronsson E, Kovács A, et  
567 al. Optimization of cell viability assays to improve replicability and reproducibility of cancer  
568 drug sensitivity screens. *Sci Rep*. 2020; 10: 5798.
- 569 9. Young NS, Ioannidis JPA, Al-Ubaydli O. Why current publication practices may distort  
570 science. *PLoS Med*. 2008; 5: e201.
- 571 10. Sena ES, van der Worp HB, Bath PMW, Howells DW, Macleod MR. Publication bias in  
572 reports of animal stroke studies leads to major overstatement of efficacy. *PLoS Biol*.  
573 2010; 8: e1000344.
- 574 11. Tsilidis KK, Panagiotou OA, Sena ES, Aretouli E, Evangelou E, Howells DW et al.  
575 Evaluation of excess significance bias in animal studies of neurological diseases. *PLoS*  
576 *Biol*. 2013; 11: e1001609.
- 577 12. Strasak AM, Zaman Q, Marinell G, Pfeiffer KP, Ulmer H. The use of statistics in medical  
578 research: A comparison of The New England Journal of Medicine and *Nature Medicine*.  
579 *The American Statistician*. 2007; 61: 47-55.
- 580 13. Baker D, Lidster K, Sottomayor, Amor S. Two years later: Journals are not yet enforcing  
581 the ARRIVE guidelines on reporting standards for pre-clinical animal studies. *PLoS Biol*.  
582 2014; 12: e1001756.
- 583 14. Weissgerber TL, Garovic VD, Milin-Lazovic JS, Winham SJ, Obradovic Z, Trzeciakowski  
584 JP et al. Reinventing biostatistics education for basic scientists. *PLoS Biol*. 2016; 14:  
585 e1002430.
- 586 15. Vaux DL. Know when your numbers are significant. *Nature*. 2012; 492: 180-181.
- 587 16. Aiken LS, West SG, Millsap RE. Doctoral training in statistics, measurement, and  
588 methodology in psychology: Replication and extension of Aiken, West, Sechrest, and  
589 Reno's (1990) survey of PhD programs in North America. *Am Psychol*. 2008; 63: 32-50.
- 590 17. Aarts E, Verhage M, Veenvliet JV, Dolan CV, van der Sluis S. A solution to dependency:  
591 Using multilevel analysis to accommodate nested data. *Nat Neurosci*. 2014; 17: 491-  
592 496.
- 593 18. Williams DR, Carlsson R, Bürkner PC. Between-litter variation in developmental studies  
594 of hormones and behavior: Inflated false positive and diminished power. *Front*  
595 *Neuroendocrinol*. 2017; 47: 154-166.

- 596 19. Raudenbush SW, Bryk AS. Hierarchical linear models: Applications and data analysis  
597 methods. 2<sup>nd</sup> ed. Thousand Oaks, CA: Sage Publications, Inc; 2002.
- 598 20. Weil CS. Selection of the valid number of sampling units and a consideration of their  
599 combination in toxicology studies involving reproduction, teratogenesis or  
600 carcinogenesis. *Food Cosmet Toxicol.* 1970; 8: 177-182.
- 601 21. Staples RE, Haseman JK. Selection of appropriate experimental units in teratology.  
602 *Teratology.* 1974; 9: 259-260.
- 603 22. Haseman JK, Hogan MD. Selection of the experimental unit in teratology studies.  
604 *Teratology.* 1975; 12: 165-171.
- 605 23. Lazic SE, Essioux L. Improving basic and translational science by accounting for litter-to-  
606 litter variation in animal models. *BMC Neurosci.* 2013; 14:37.
- 607 24. Waller BM, Warmelink L, Liebal K, Micheletta J, Slocombe KE. Pseudoreplication: A  
608 widespread problem in primate communication research. *Anim Behav.* 2013; 86: 483-  
609 488.
- 610 25. Lazic SE, Clarke-Williams CJ, Munafò MR. What exactly is 'N' in cell culture and animal  
611 experiments? *PLoS Biol.* 2018; 16: e2005282.
- 612 26. Holson RR, Pearce B. Principles and pitfalls in the analysis of prenatal treatment effects  
613 in multiparous species. *Neurotoxicol Teratol.* 1992; 14: 221-228.
- 614 27. Gailbraith S, Daniel JA, Vissel B. A study of clustered data and approaches to its  
615 analysis. *J Neurosci.* 2010; 30: 10601-10608.
- 616 28. Aarts E, Dolan CV, Verhage M, van der Sluis S. Multilevel analysis quantifies variation  
617 in the experimental effect while optimizing power and preventing false positives. *BMC*  
618 *Neurosci.* 2015; 16: 94.
- 619 29. Fisher RA. *Statistical methods for research workers.* Edinburgh: Oliver and Boyd; 1925.
- 620 30. Fleiss JL, Cohen J. The equivalence of weighted kappa and the intraclass correlation  
621 coefficient as measures of reliability. *Educ Psychol Meas.* 1973; 33: 613-619.
- 622 31. Clarke P. When can group level clustering be ignored? Multilevel models versus single-  
623 level models with sparse data. *J Epidemiol Community Health.* 2008; 62: 752-758.
- 624 32. Cohen J. *Statistical power analysis for the behavioral sciences.* Hillsdale, NJ: Lawrence  
625 Erlbaum Associates; 1988.
- 626 33. Muthén B, Kaplan D, Hollis M. On structural equation modeling with data that are not  
627 missing completely at random. *Psychometrika.* 1987; 52: 431-462.
- 628 34. Bandalos DL, Leite WL. Use of monte carlo studies in structural equation modeling  
629 research. In: Hancock GR, Mueller RO, editors. *Structural equation modeling: A second*  
630 *course.* 2<sup>nd</sup> ed. Greenwich, CT: Information Age Publishing; 2013. pp. 564-666.
- 631 35. Muthén LK, Muthén BO. How to use a monte carlo study to decide on sample size and  
632 determine power. *Struct Equ Modeling.* 2002; 4: 599-620.
- 633 36. Kromrey JD, Dickinson WB. Detecting unit of analysis problems in nested designs:  
634 Statistical power and type 1 error rates of the F test for groups-within-treatments effects.  
635 *Educ Psychol Meas.* 1996; 56: 215-231.
- 636 37. Bolin JH, Finch WH, Stenger R. Estimation of random coefficient multilevel models in  
637 context of small numbers of level 2 clusters. *Educ Psychol Meas.* 2019; 79: 217-248.
- 638 38. Roettger TB. Researcher degrees of freedom in phonetic research. *Laboratory*  
639 *Phonology: Journal of the Association for Laboratory Phonology.* 2019; 10: 1.
- 640 39. Button KS, Ioannidis JPA, Mokrysz C, Nosek BA, Flint J, Robinson ESJ, et al. Power  
641 failure: Why small sample size undermines the reliability of neuroscience. *Nat Rev*  
642 *Neurosci.* 2013; 14: 365-376.

- 643 40. Nord CL, Valton V, Wood J, Roiser JP. Power-up: A reanalysis of ‘Power Failure’ in  
644 neuroscience using mixture modeling. *J Neurosci*. 2017; 37: 8051-8061.
- 645 41. Holman C, Piper SK, Grittner U, Diamantaras AA, Kimmelman J, Siegerink B, et al.  
646 Where have all the rodents gone? The effects of attrition in experimental research on  
647 cancer and stroke. *PLoS Biol*. 2016; 14: e1002331.
- 648 42. Charan J, Kantharia ND. How to calculate sample size in animal studies? *Journal of*  
649 *Pharmacol Pharmacother*. 2013; 4: 303-306.
- 650 43. Scherbaum CA, Ferreter JM. Estimating statistical power and required sample sizes for  
651 organizational research using multilevel modeling. *Organ Res Methods*. 2009; 12: 347-  
652 367.
- 653 44. Tabachnick BG, Fidell LS. *Experimental design using ANOVA*. Belmont, CA:  
654 Thomson/Brooks/Cole; 2007.
- 655 45. Raudenbush SW. Statistical analysis and optimal design for cluster randomized trials.  
656 *Psychol Methods*. 1997; 2: 173-185.
- 657 46. Hernández AV, Steyerberg EW, Habbema JDF. Covariate adjustment in randomized  
658 controlled trials with dichotomous outcomes increases statistical power and reduces  
659 sample size requirements. *J Clin Epidemiol*. 2004; 57: 454-460.
- 660 47. Lingsma H, Roozenbeek B, Steyerberg E, IMPACT Investigators. Covariate adjustment  
661 increases statistical power in randomized controlled trials. *J Clin Epidemiol*. 2010; 63:  
662 1391.
- 663 48. Arceneaux K, Nickerson DW. Modeling certainty with clustered data: A comparison of  
664 methods. *Political Analysis*. 2009; 17: 177-190.
- 665 49. Musca SC, Kamiejski R, Nugier A, Méot, A, Er-Rafiy A, Brauer M. Data with hierarchical  
666 structure: Impact of intraclass correlation and sample size on type-1 error. *Front*  
667 *Psychol*. 2011; 2: 74.
- 668 50. Winer BJ. *Statistical principles in experimental design*. 2nd ed. New York: McGraw-Hill;  
669 1971.
- 670 51. Denenberg VH. *Statistics and experimental design for behavioral and biological*  
671 *researchers: An introduction*. Hemisphere, WA: Halsted Press; 1976.
- 672 52. Liang KY, Zeger SL. Longitudinal data analysis using generalized linear models.  
673 *Biometrika*. 1996; 73: 13-22.
- 674 53. Zeger SL, Liang KY. Longitudinal data analysis for discrete and continuous outcomes.  
675 *Biometrics*. 1986; 42: 121-130.
- 676 54. Feng Z, McLerran D, Grizzle J. A comparison of statistical methods for clustered data  
677 analysis with Gaussian error. *Stat Med*. 1996; 15: 1793-1806.
- 678 55. McNeish DM. Modeling sparsely clustered data: Design-based, model-based, and  
679 single-level methods. *Psychological Methods*. 2014; 19: 552-563.
- 680 56. McNeish DM, Stapleton LM. Modeling clustered data with very few clusters. *Multivariate*  
681 *Behavioral Research*. 2016; 51: 495-518.
- 682 57. Gunsolley JC, Getchell C, Chinchilli VM. Small sample characteristics of generalized  
683 estimating equations. *Commun Stat-Simul C*. 1995; 24: 869-878.
- 684 58. Fay MP, Graubard BI. Small-sample adjustments for Wald-type tests using sandwich  
685 estimators. *Biometrics*. 2001; 57: 1198-1206.
- 686 59. Pan W, Wall MM. Small-sample adjustments in using the sandwich variance estimator in  
687 generalized estimating equations. *Stat Med*. 2002; 21: 1429-1441.
- 688 60. Venables WN, Ripley BD. *Modern Applied Statistics with R*. 4th ed. New York: Springer;  
689 2002.

- 690 61. Pinheiro J, Bates D, DebRoy S, Sarkar D, R Core Team. nlme: Linear and nonlinear  
691 mixed effects models; 2020 [cited 2020 Nov 3]. R package version 3.1-148. Available  
692 from: <https://cran.r-project.org/web/packages/nlme/index.html>  
693 62. Sholl DA. Dendritic organization in the neurons of the visual and motor cortices of the  
694 cat. *J Anat.* 1953; 87: 387-406.  
695 63. Wilson MD, Sethi S, Lein PJ, Keil KP. Valid statistical approaches for analyzing sholl  
696 data: Mixed effects versus simple linear models. *J Neurosci Methods.* 2017; 279: 33-43.

697 **S1 File. Population Intraclass Correlations (ICC).** It is noted that the ICC for a given condition  
698 may not be identical to the target values. For the small ICC, the population ICCs ranged from  
699 0.152 to 0.166 across conditions. In terms of the large ICC, the population ICCs ranged from  
700 0.590 to 0.604. The detailed information regarding the population values of the error variances  
701 and ICCs is provided.

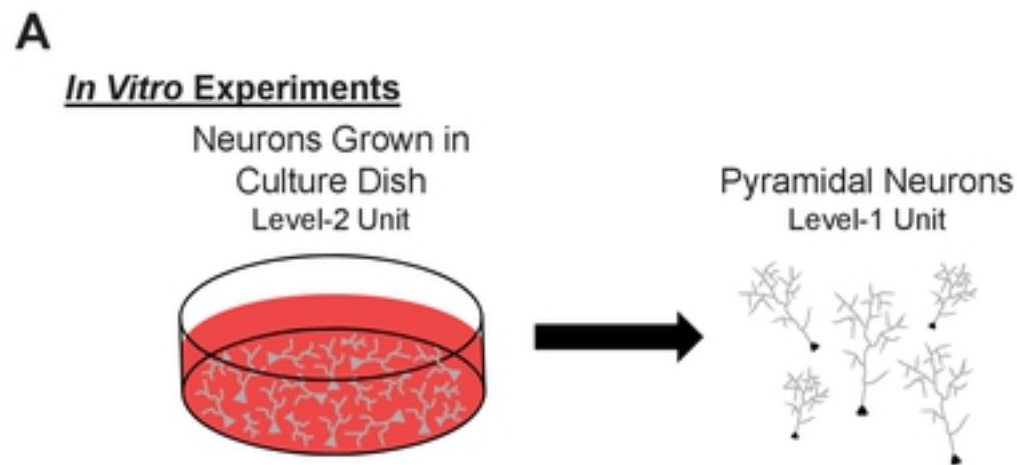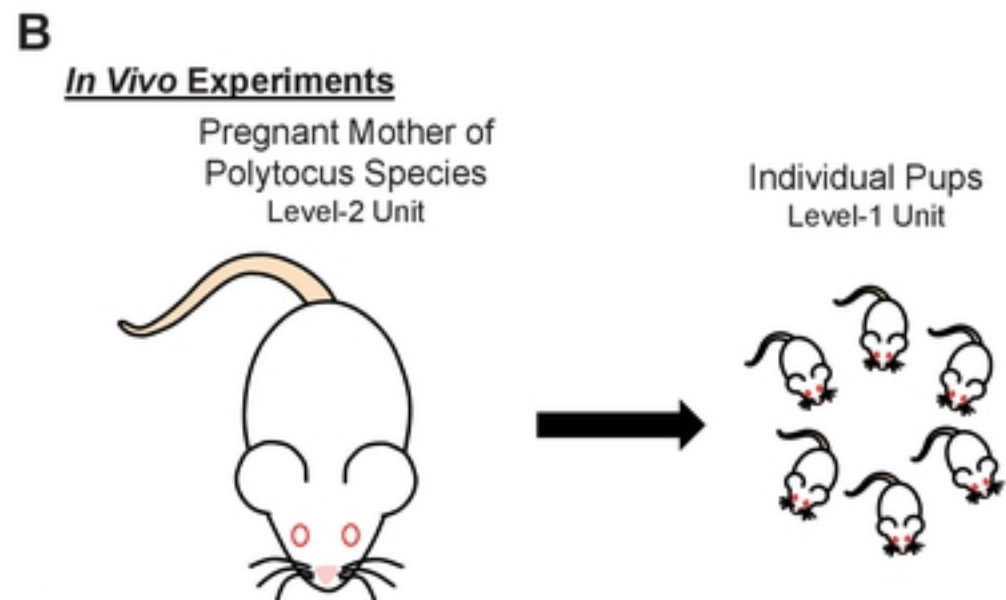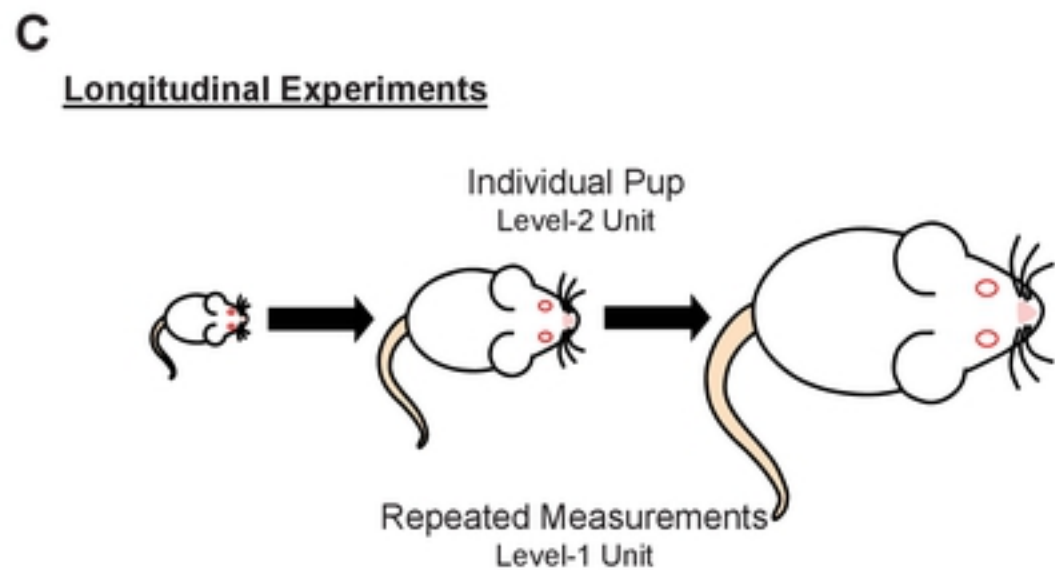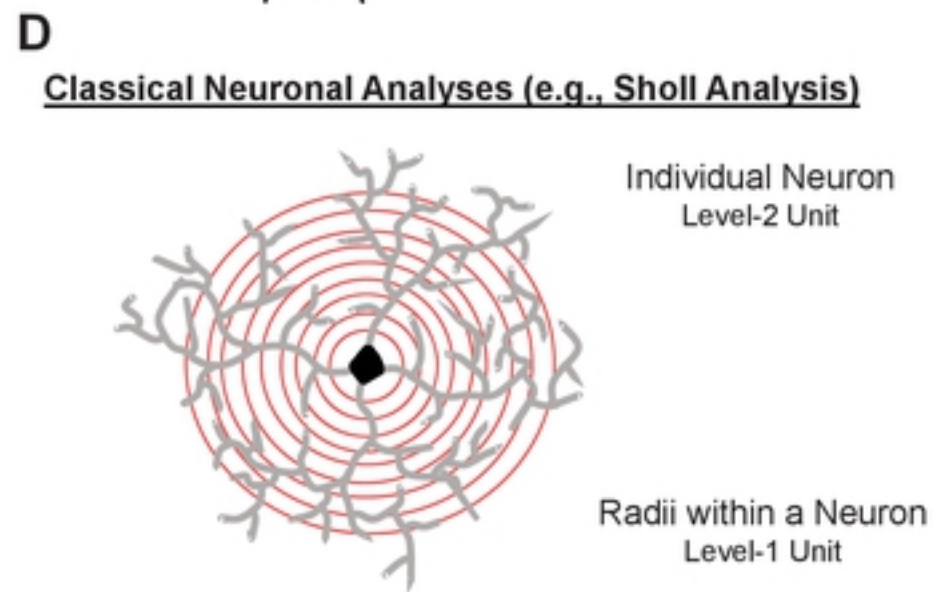

Figure 1

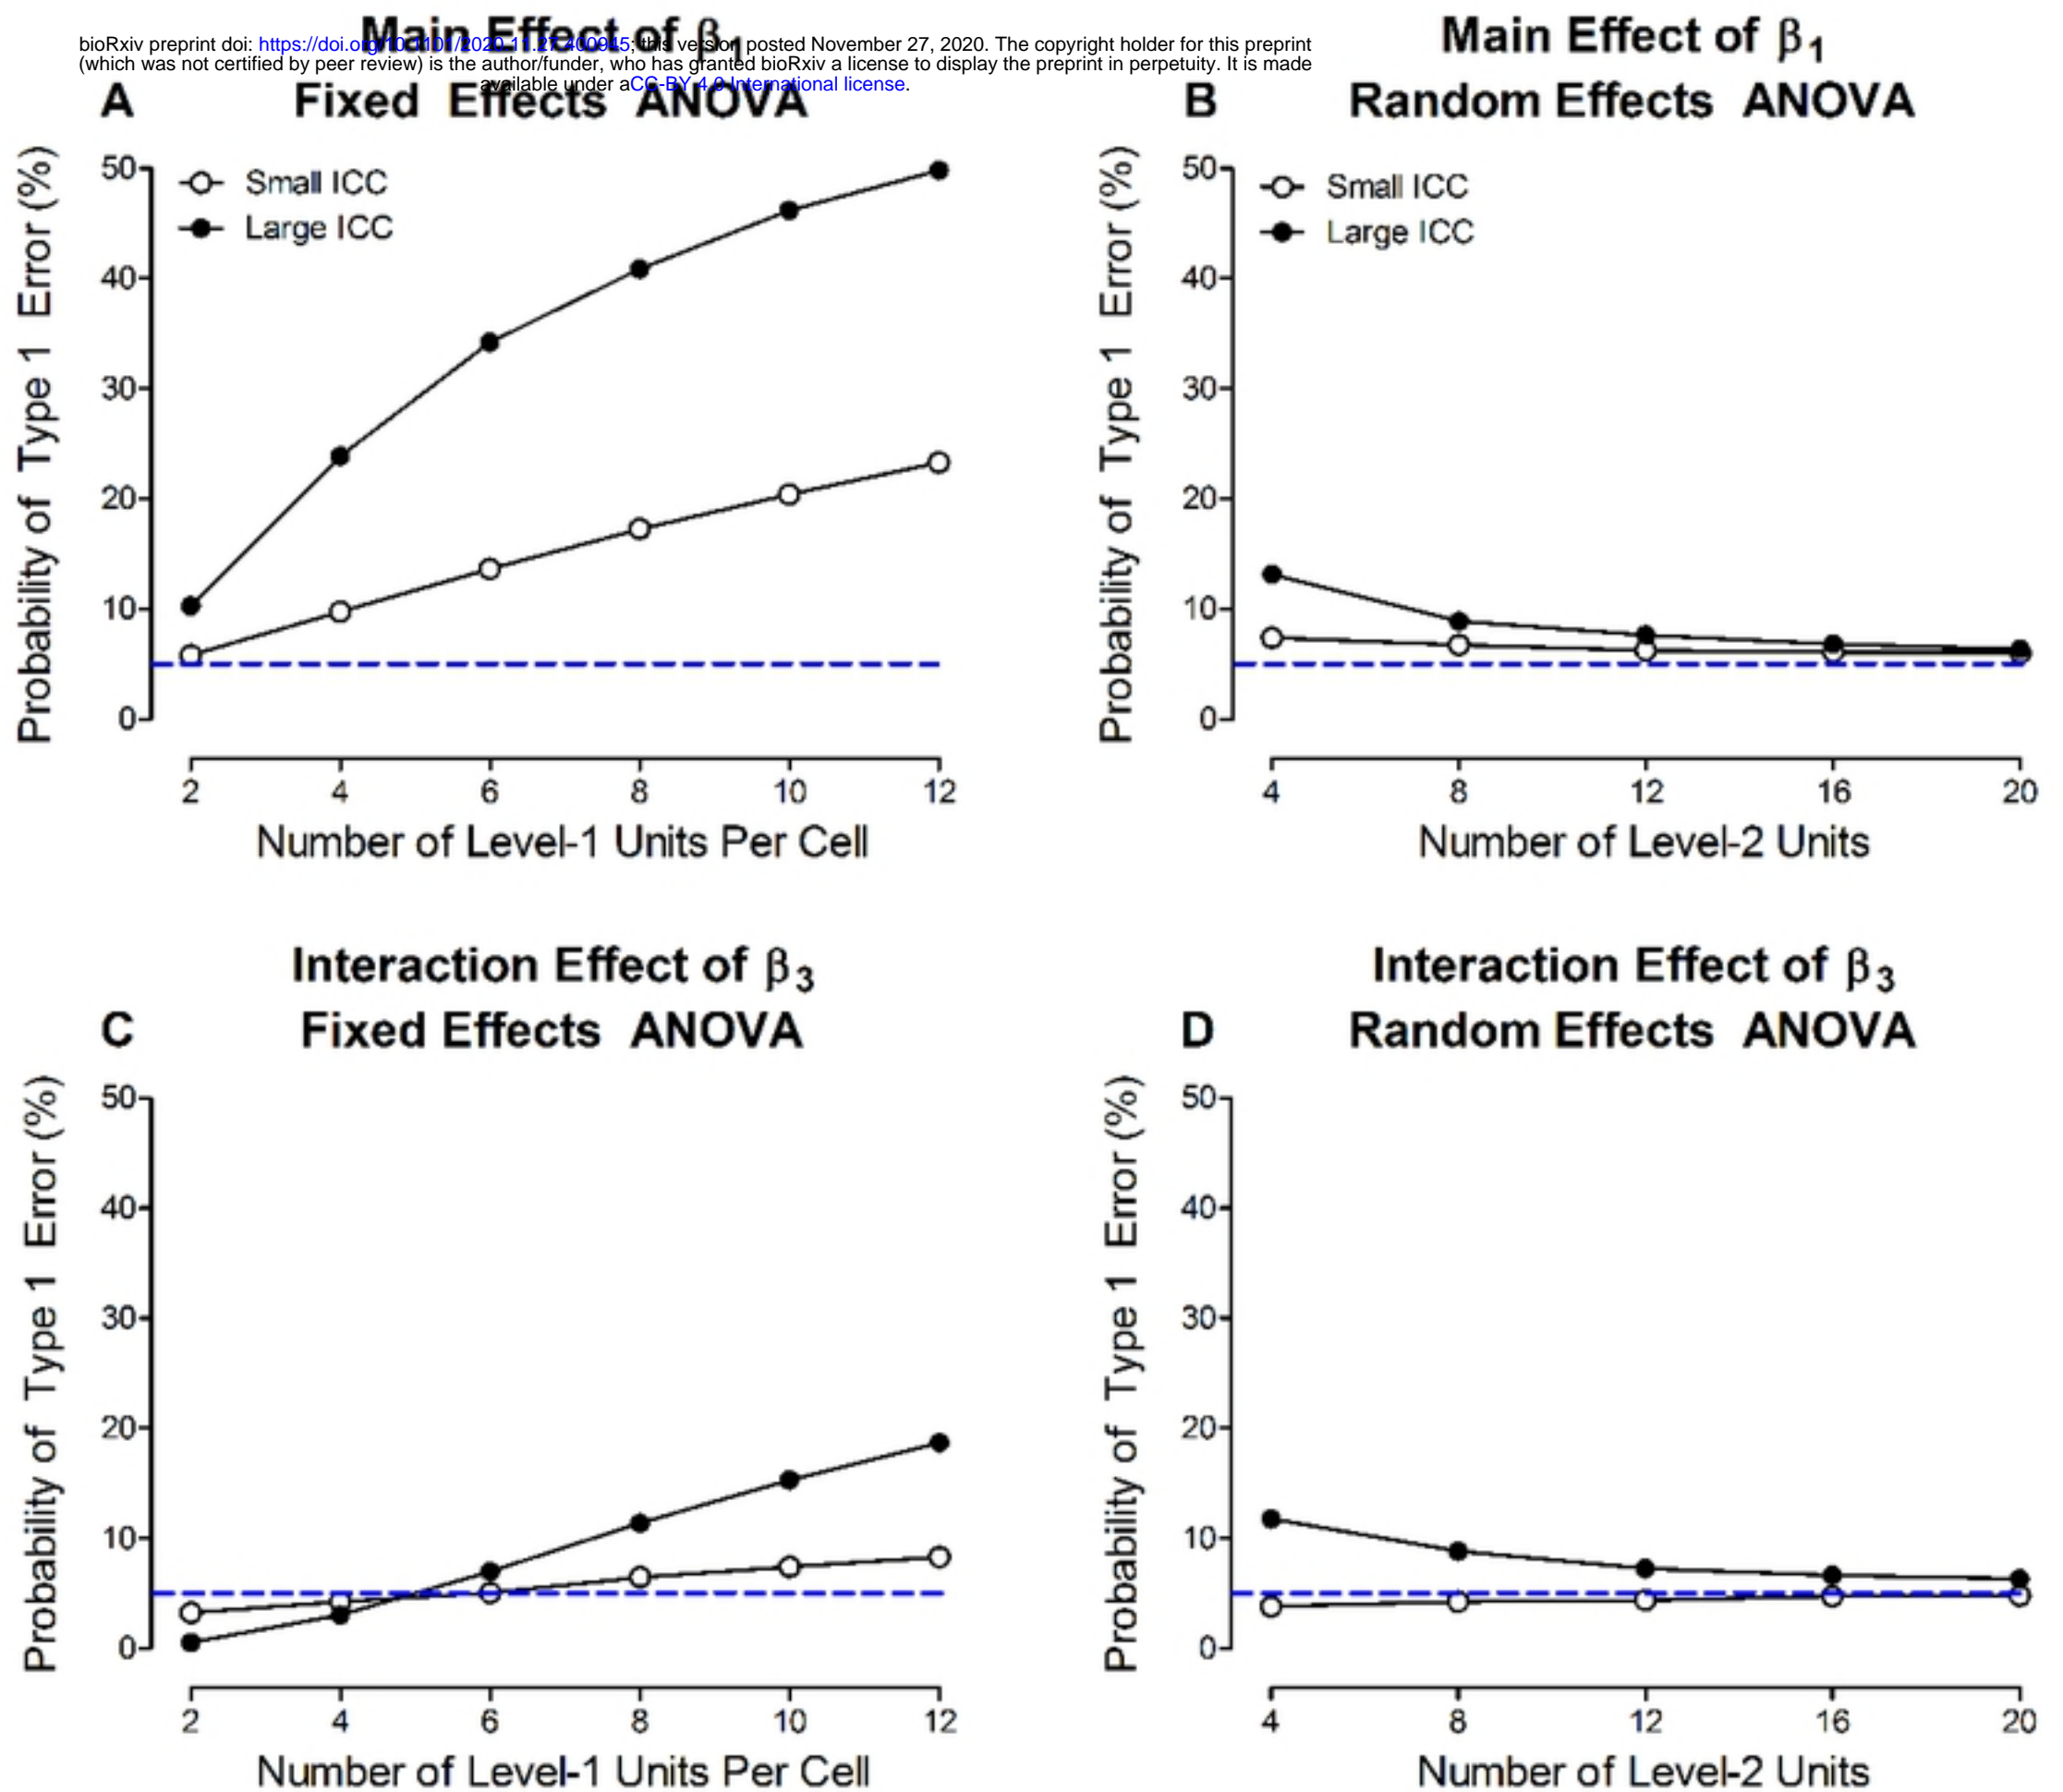

Figure 2



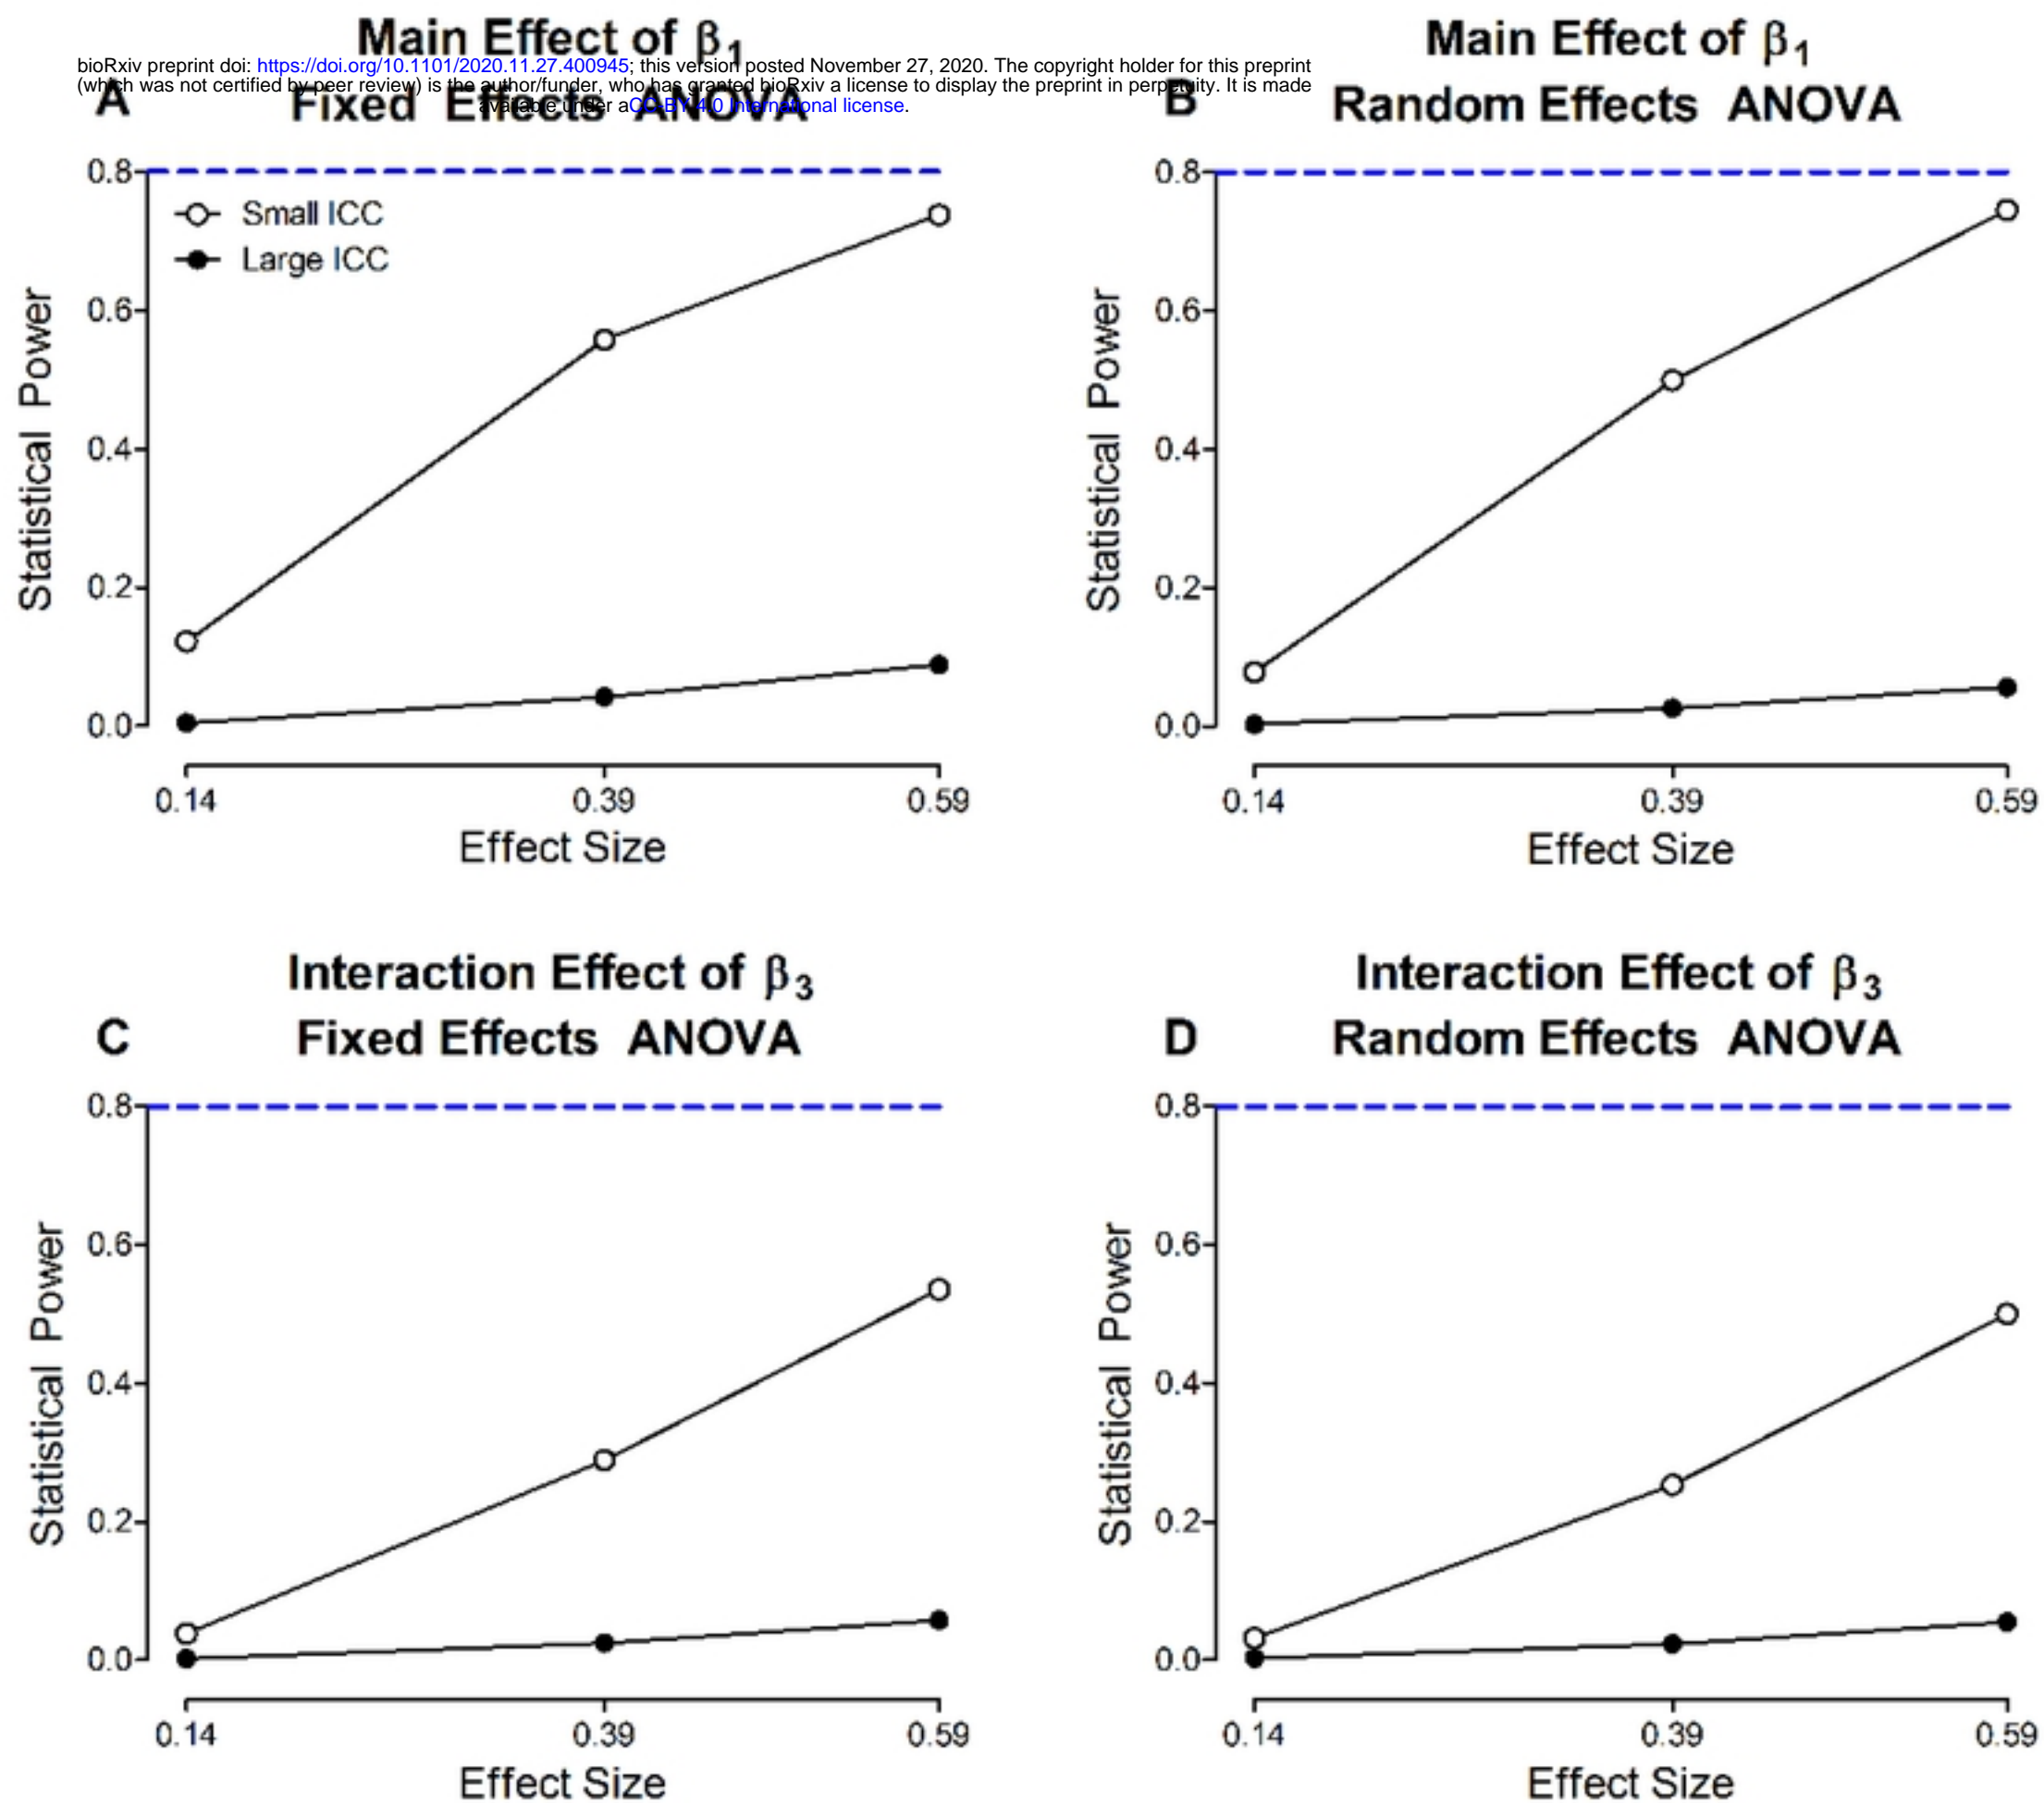

Figure 3

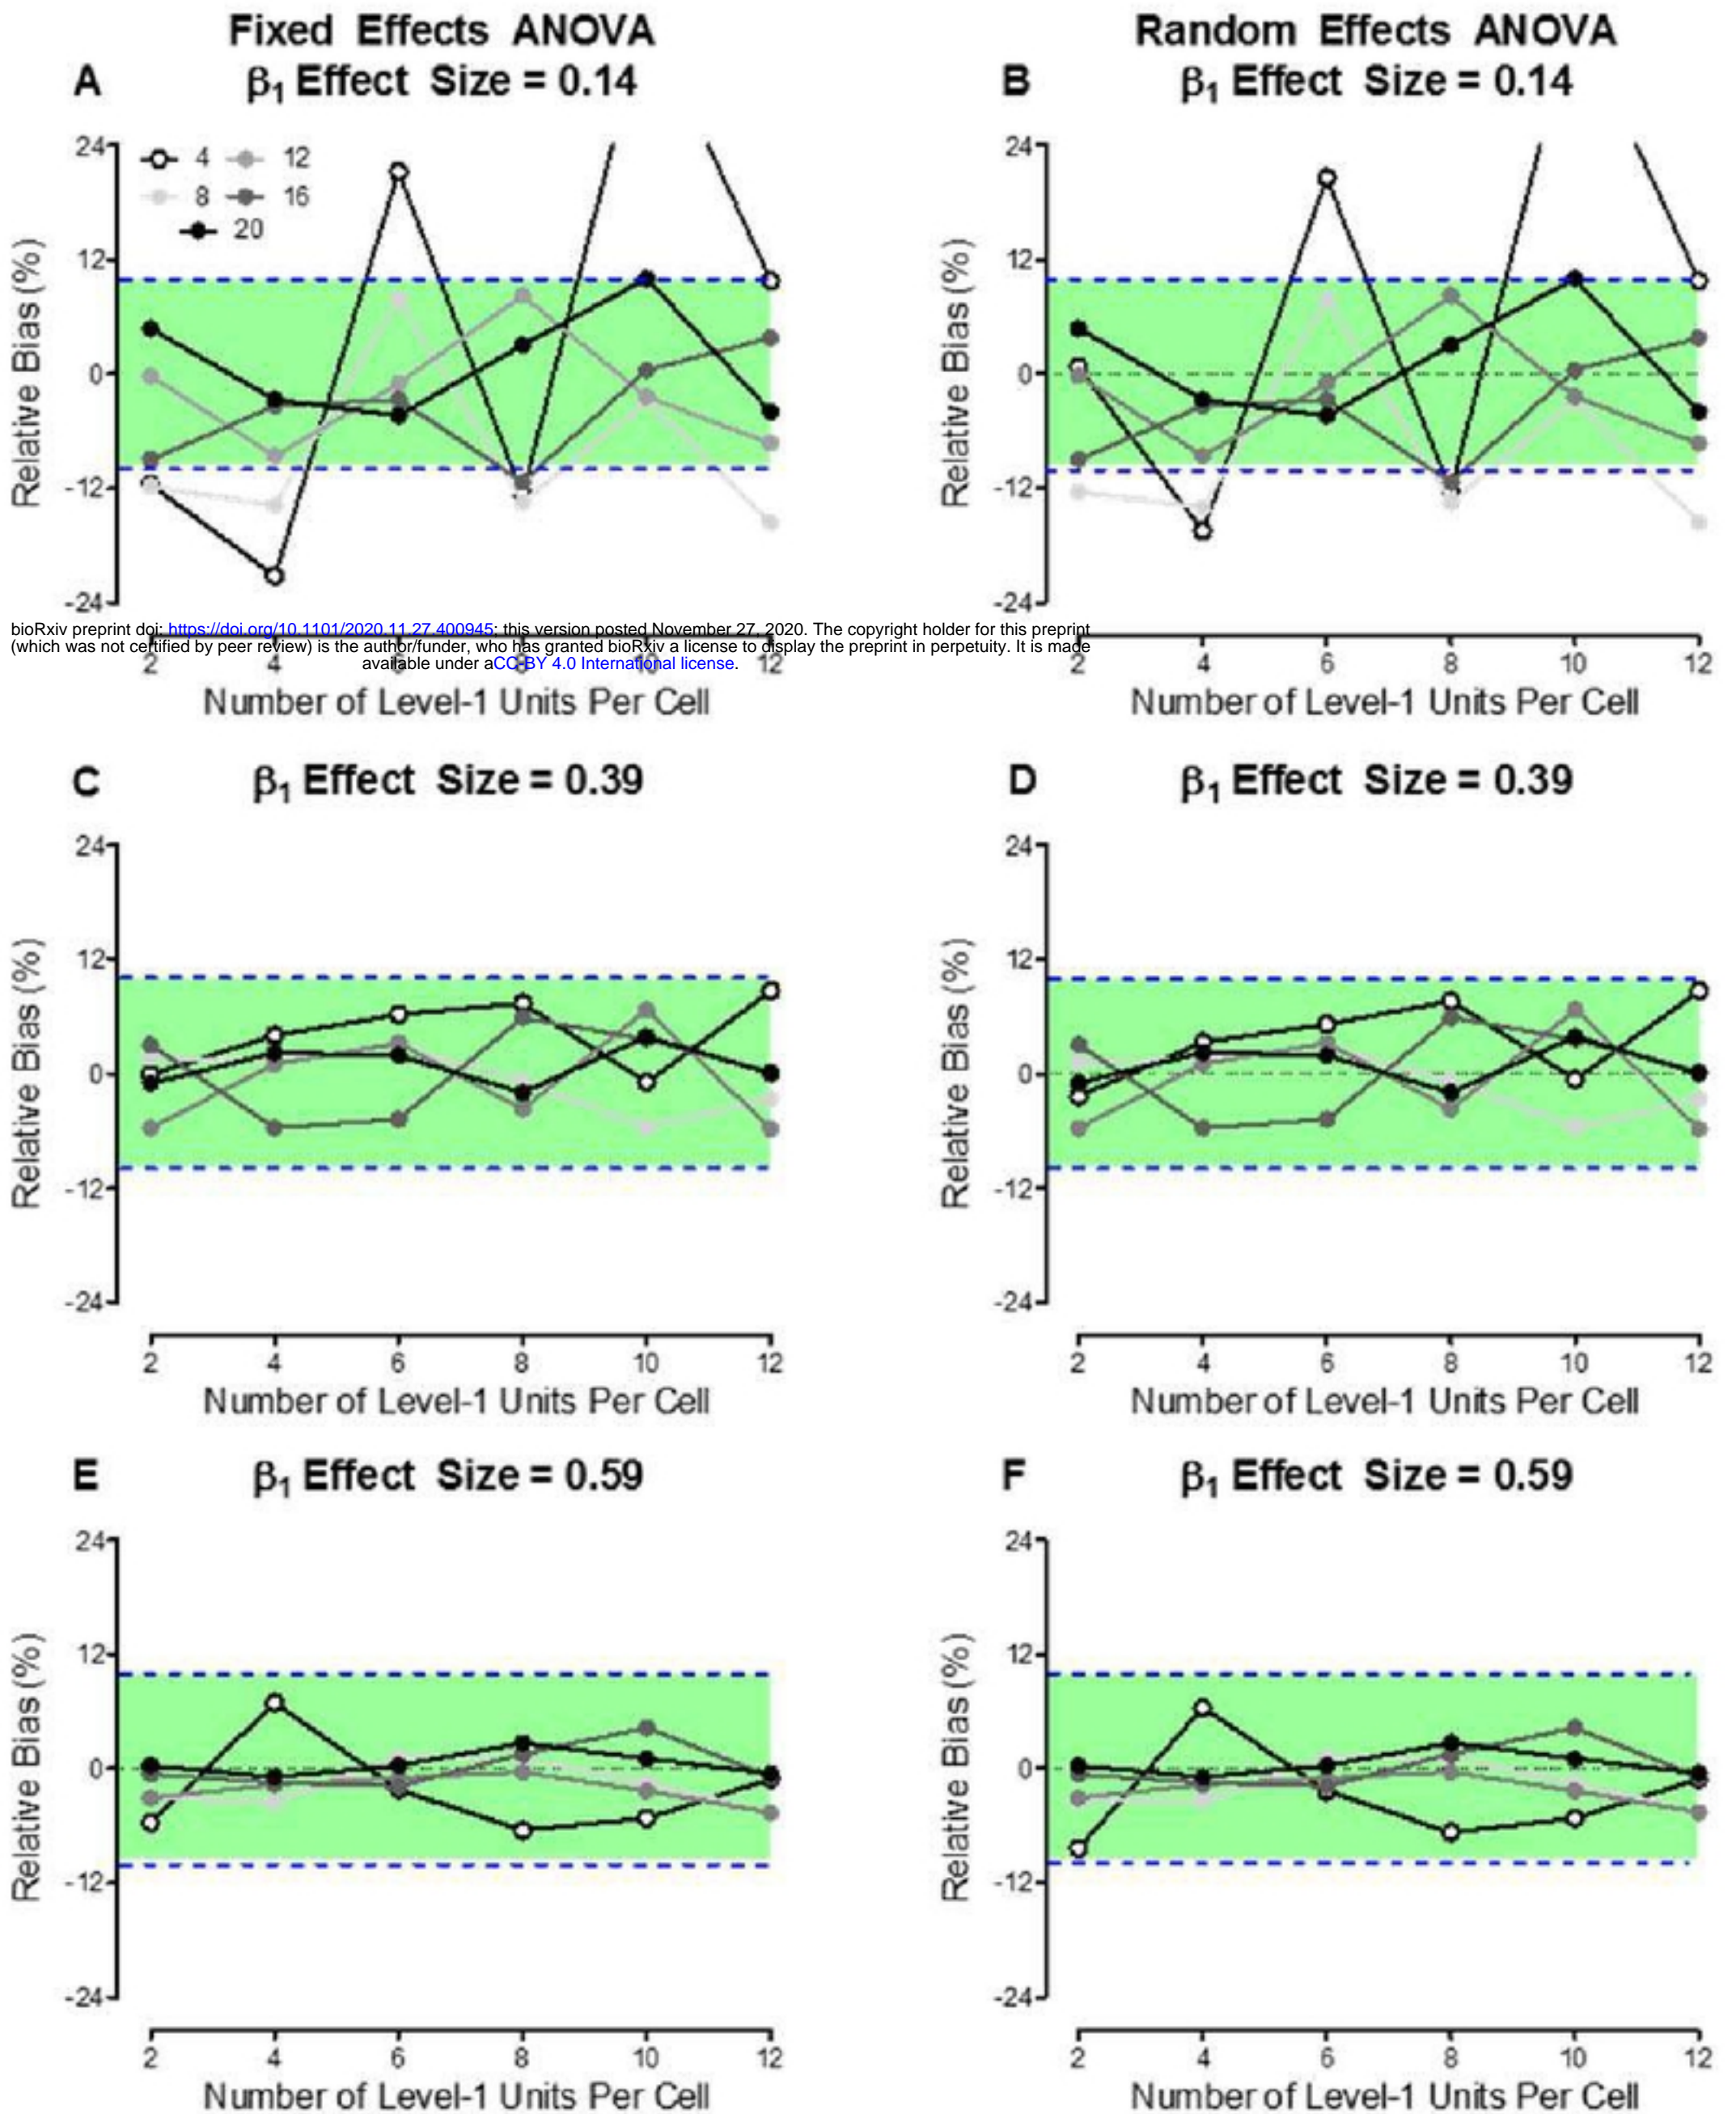

bioRxiv preprint doi: <https://doi.org/10.1101/2020.11.27.400945>; this version posted November 27, 2020. The copyright holder for this preprint (which was not certified by peer review) is the author/funder, who has granted bioRxiv a license to display the preprint in perpetuity. It is made available under aCC-BY 4.0 International license.

Figure 4

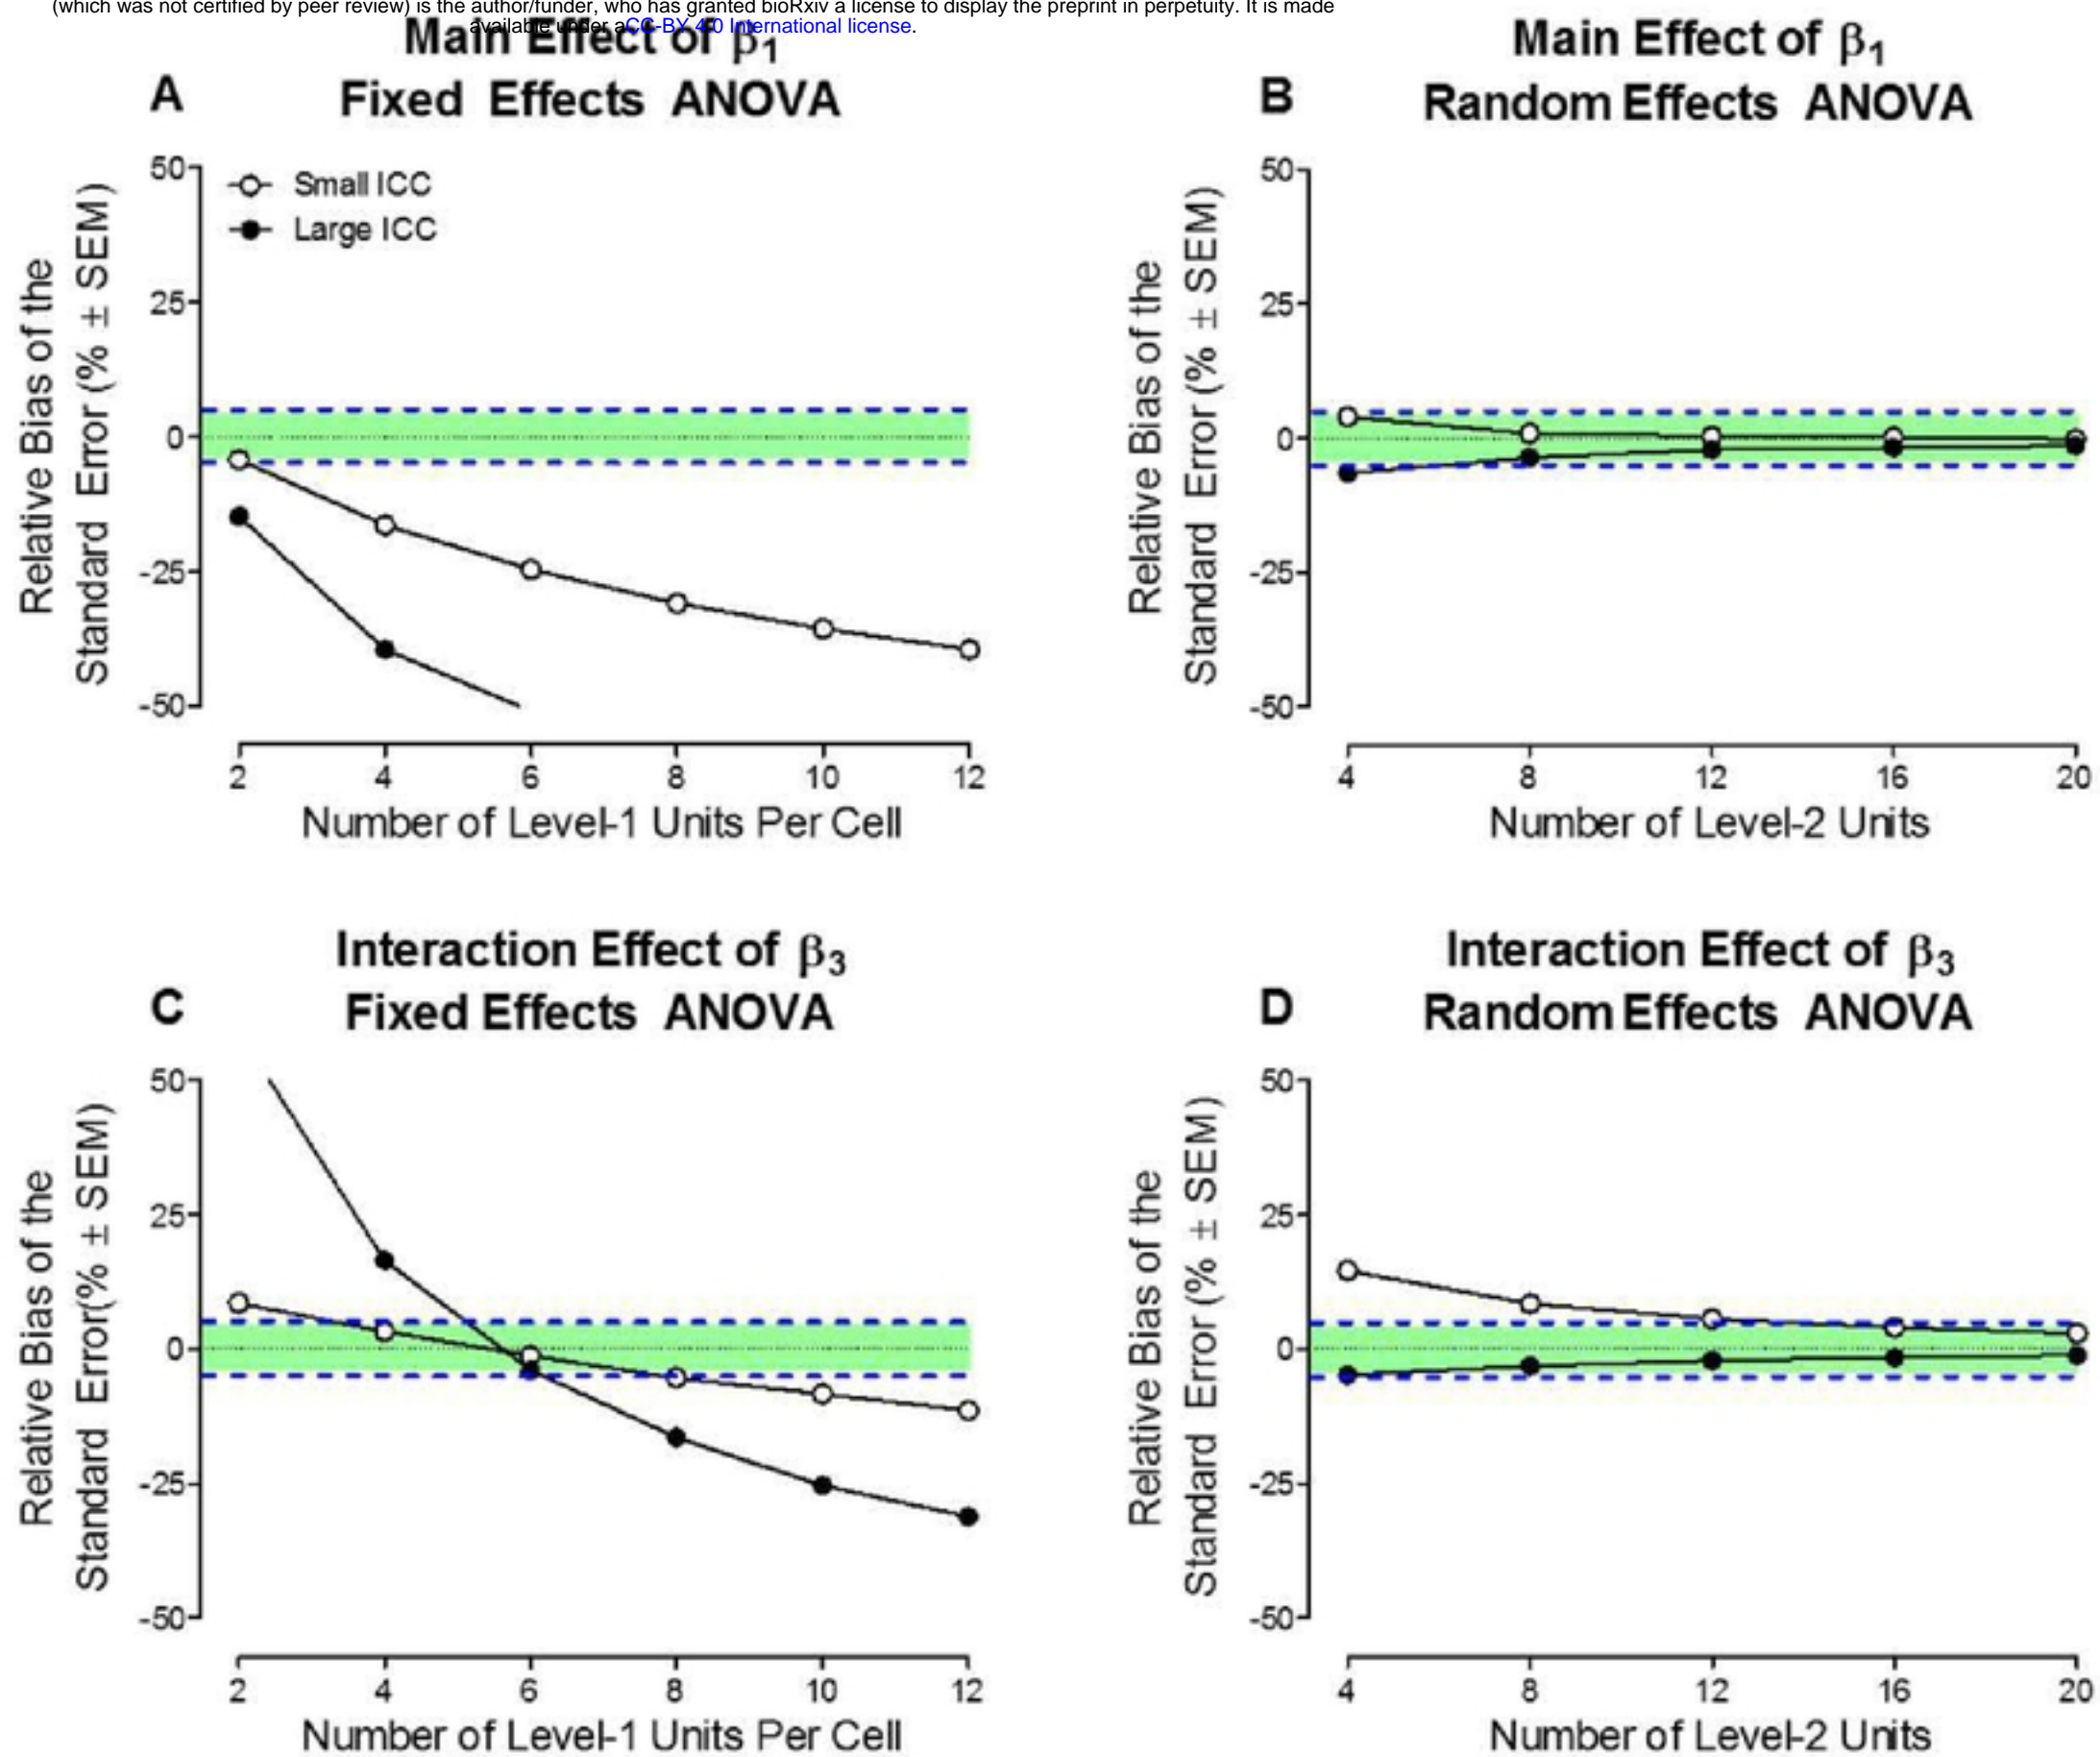

Figure 5

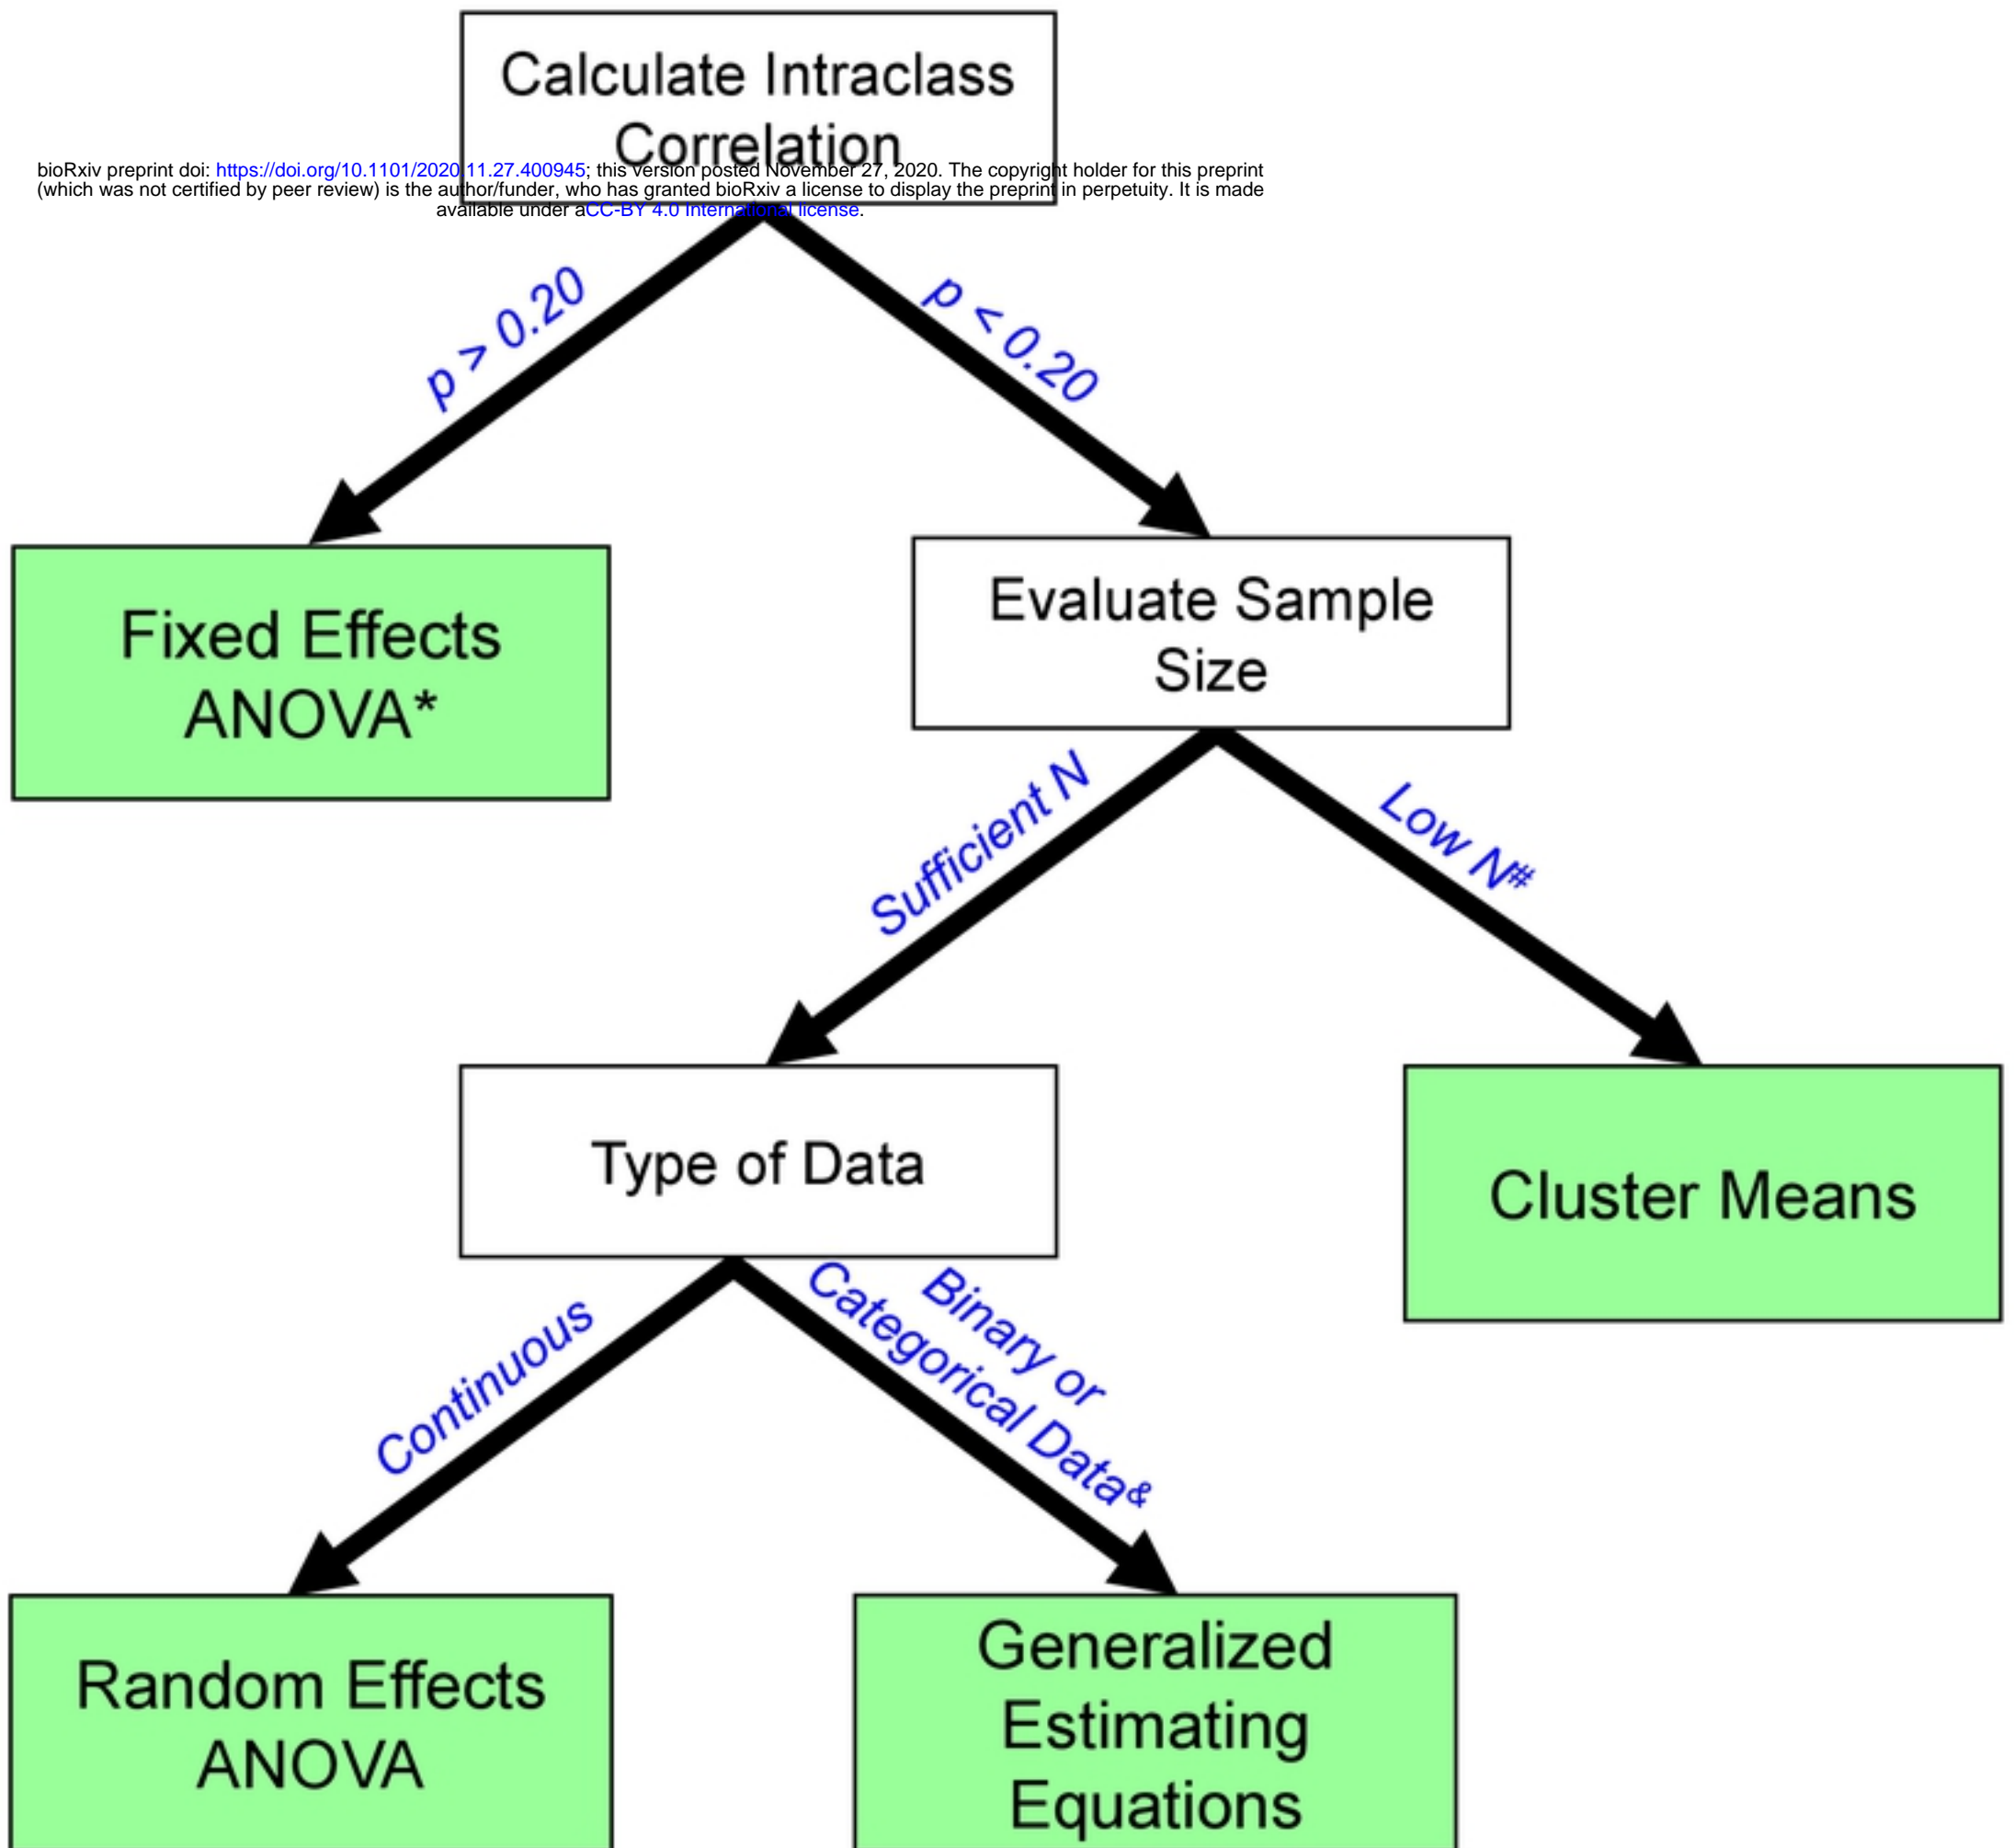

Figure 6
